# Supplementary material for: Determination of the Modulus of Elasticity by Bending Tests of Specimens with Nonuniform Cross Section
Source: Springer Nature journal article supplement (doi:10.1007/s11340-023-00945-y), 2023-03-01
Supplement: MOESM1 [file 24083832]

# Determination of the Modulus of Elasticity by Bending Tests of Specimens with Nonuniform Cross Section - Supplementary Material

*M. Gebhardt<sup>1,2</sup>, H. Steinke<sup>2</sup>, V. Slowik<sup>1,\*</sup>*

<sup>1</sup> Institute of Experimental Mechanics, Leipzig University of Applied Sciences,  
Karl-Liebknecht-Straße 132, 04277 Leipzig, Germany

<sup>2</sup> Institute of Anatomy, Leipzig University, Liebigstraße 13, 04103 Leipzig, Germany

\* Corresponding author

## Table of contents

|                                                   |    |
|---------------------------------------------------|----|
| 1. Additional information on the experiments..... | 2  |
| 1.1. Test procedure .....                         | 2  |
| 1.2. Measurement .....                            | 2  |
| 1.3. Drawings of the test device .....            | 2  |
| 2. Additional evaluation results.....             | 8  |
| 3. Verification tests.....                        | 16 |
| 3.1. Specimens.....                               | 16 |
| 3.2. Test procedure .....                         | 16 |
| 3.3. Measurement .....                            | 16 |
| 3.4. Assumptions .....                            | 16 |
| 3.5. Results .....                                | 17 |

## 1. Additional information on the experiments

### 1.1. Test procedure

- Displacement controlled testing with:  
 $\dot{w} = (\dot{\epsilon} \times s^2)/(6 \times t)$ ,  $\dot{\epsilon} = 0.005 \text{ s}^{-1}$ ,  $s = 20 \text{ mm}$ ,  $t = \text{thickness in midspan}$
- Maximum force (safety threshold)  $F_{max,sec} = 250 \text{ N}$
- Load until failure, or decrease of force by  $0.3 \times F_{max}$

### 1.2. Measurement

- Conventional:
  - Data acquisition system: QuantumX (100 Hz sampling rate, no filters; MX840B, Hottinger Brüel & Kjaer, Darmstadt, Germany)
  - Displacement: LVDT W10K, Hottinger Brüel & Kjaer, Darmstadt, Germany)
  - Force: internal load cell of testing machine and additional 20 kg-load cell (S40S-G3-0020, Bosche, Damme, Germany)
- Optical:
  - Measuring method: Digital Image Correlation (DIC; 4 Hz sampling rate; Q400 DCM 12.0, Limes, Krefeld, Germany; Istra4D, Dantec Dynamics, Skovlunde, Denmark) with 50 mm lens (VS-5018H1, VS Technology, Tokyo, Japan) and spacer rings (5 + 10 mm), object distance  $\sim 250 \text{ mm}$ , camera distance  $\sim 164 \text{ mm}$
  - Lighting: two area LED lights (T120, Shenzhen Neewer Technology, Shenzhen, China) at 5600 K
  - Calibration: Istra4D calibration target (2 mm marked white glass [GL-02-WMB\_9x9])
  - Marking:
    - Indirect: Speckle pattern with measurement marks laser printed on weather-resistant labels (AST-Speckle-Pattern\_Labels\_V03-2.pdf on L4775, Avery Zweckform, Oberlaindhaim, Germany)
    - Direct:
      - Opaque white priming (Eberhard Faber, Stein, Germany) with brush (GH30414, da Vinci Künstlerpinsel-fabrik DEFET, Nuremberg, Germany)
      - Black toner dust (2220D, Ricoh, Tokyo, Japan)
      - Pollinator can with flat filter (one layer of URMA, 1-2-3 Filter, Reinbek, Germany)
      - Draught-proof chamber
- Synchronization: Analog trigger (5 V batterie with switch)

### 1.3. Drawings of the test device

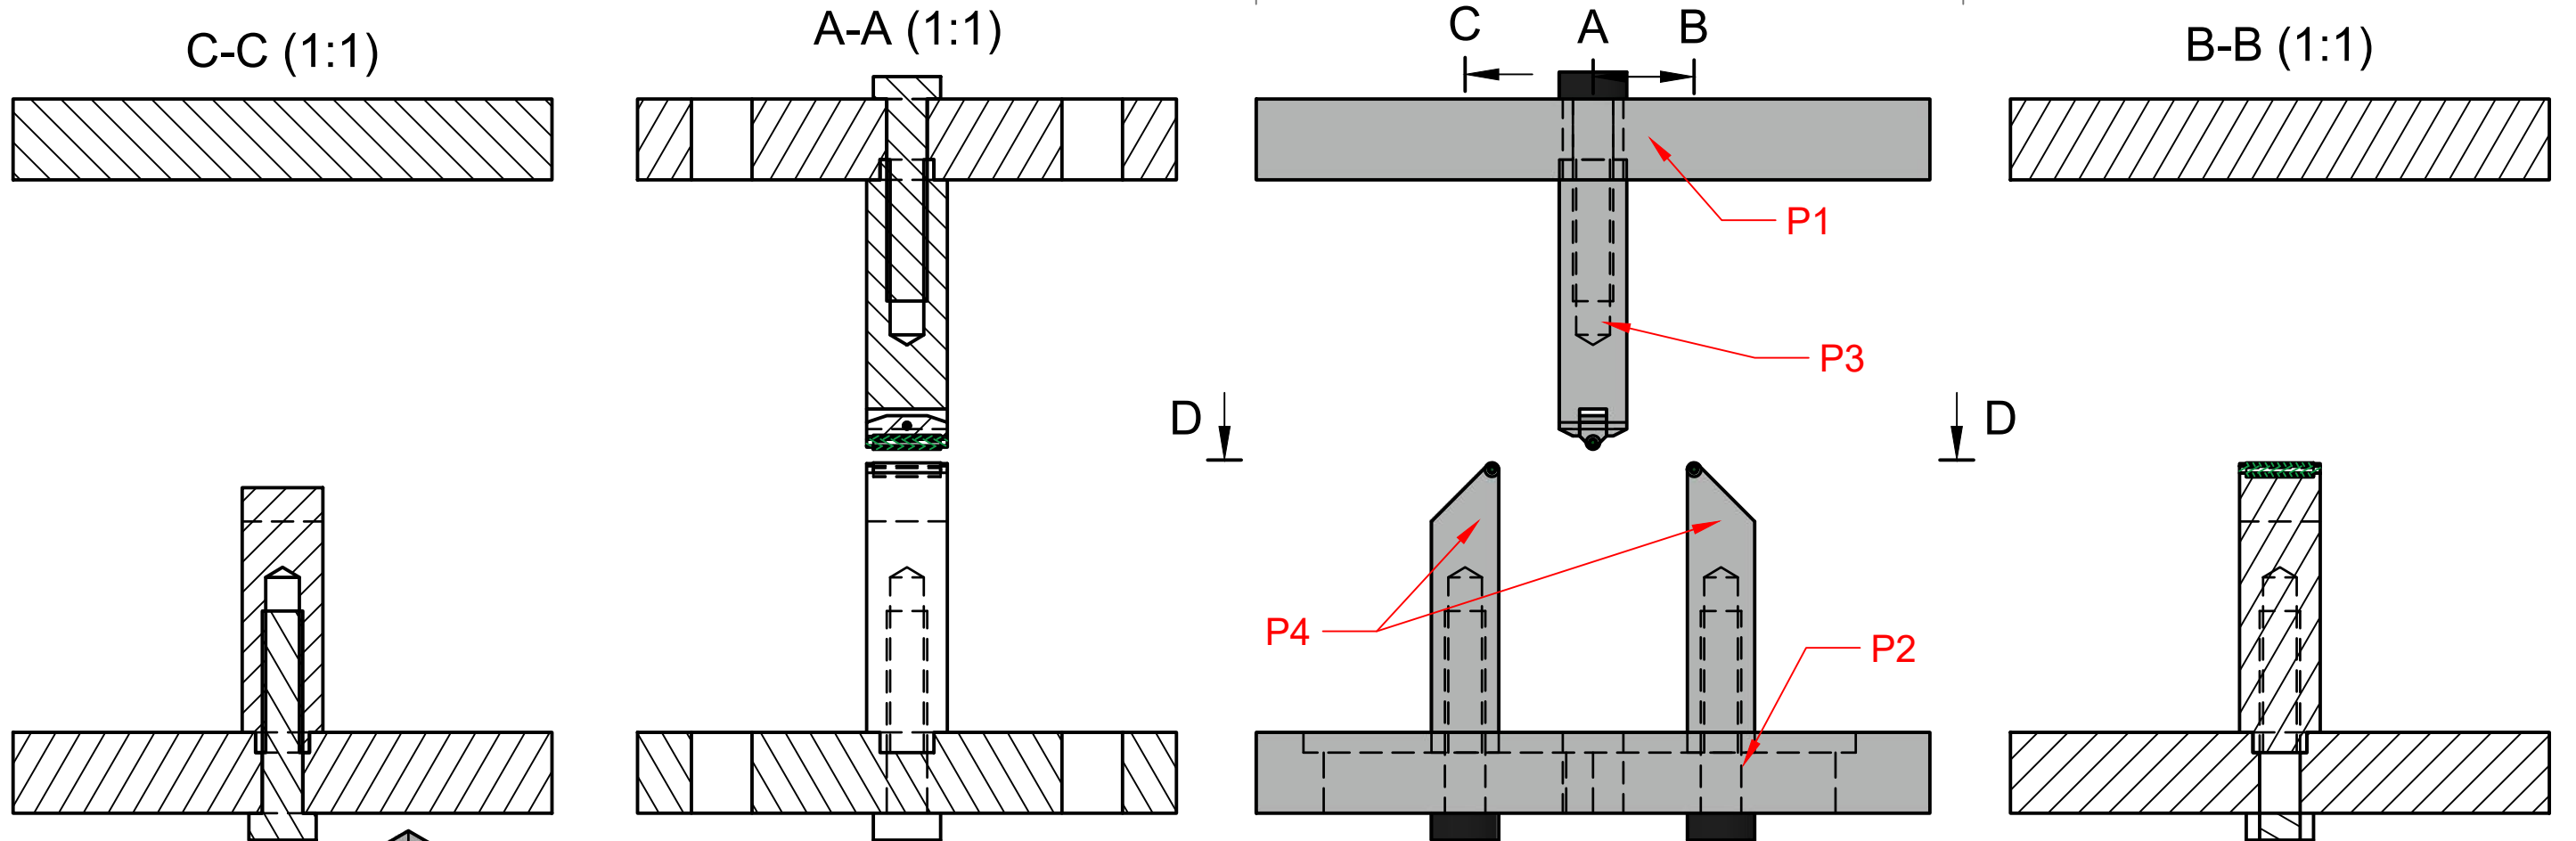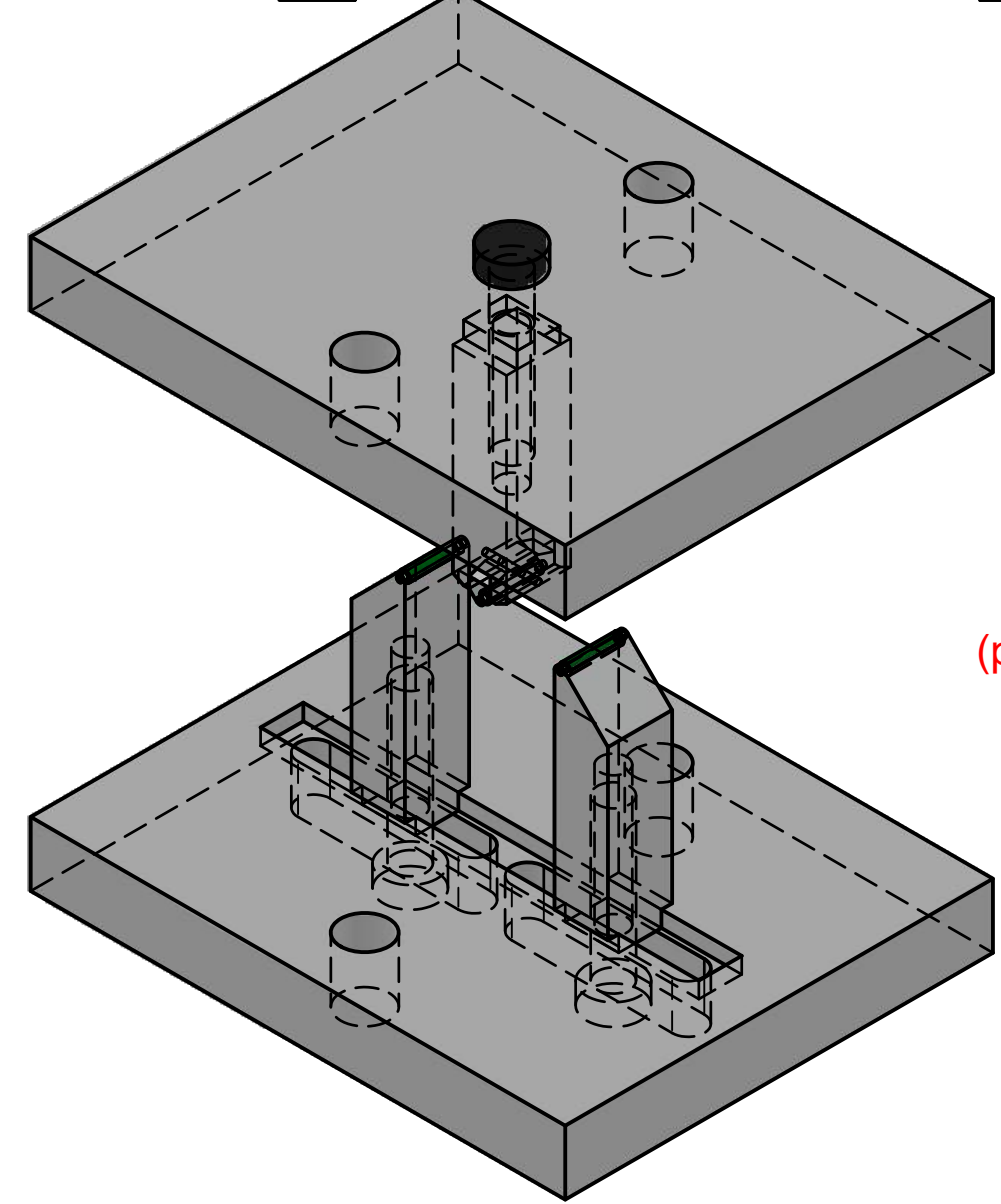

eccentric due to interchangeability of fixed and rotatable stamp (please install centric to load application)

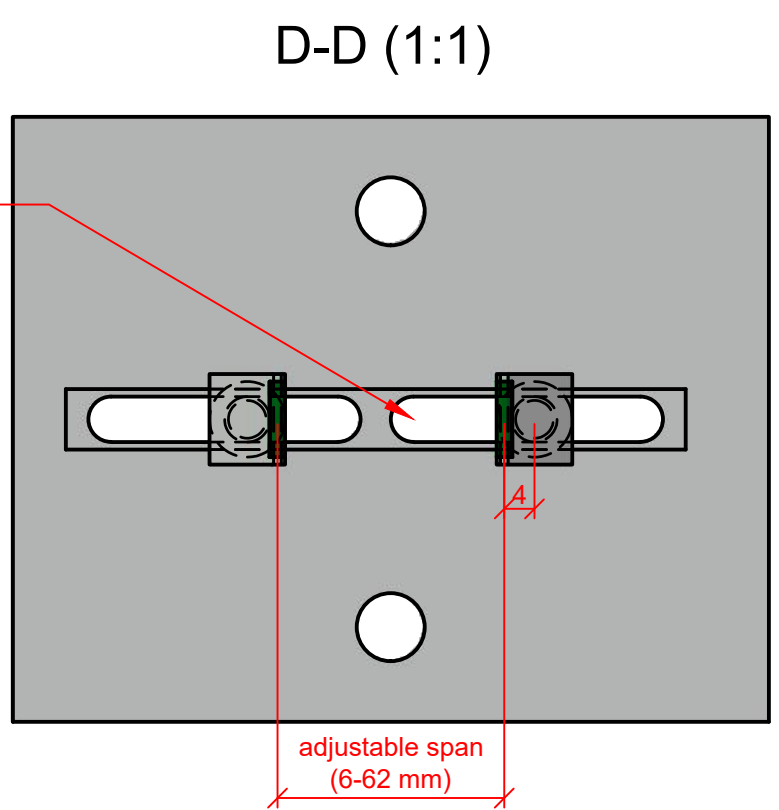

| Parts |      |                         |                 |
|-------|------|-------------------------|-----------------|
| No.   | Qty. | Description             | Drawing sub no. |
| P1    | 1    | Base plate top          | *-001           |
| P2    | 1    | Base plate bottom       | *-002           |
| P3    | 1    | Stamp rotatable         | *-003           |
| P4    | 2    | Stamp fixed             | *-004           |
| P5    | 3    | DIN 7984 M6-1.0 x 30 A2 | -               |

|                                                                        |             |                                                                  |                           |
|------------------------------------------------------------------------|-------------|------------------------------------------------------------------|---------------------------|
| Scale: -                                                               |             | Format: A3                                                       |                           |
| Material: Stainless steel V2                                           |             |                                                                  |                           |
| Description: Three-point bending test setup for cortical bone Overview |             |                                                                  |                           |
| Drawing number: PF004-004-000                                          | Revision: 4 | Original date: 27.02.2019                                        | Revision date: 10.08.2022 |
| Drawer: Marc Gebhardt                                                  |             | Organisation: <b>HTWK</b> Leipzig University of Applied Sciences |                           |

E-E (1:1)

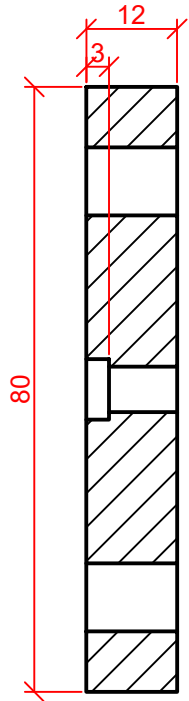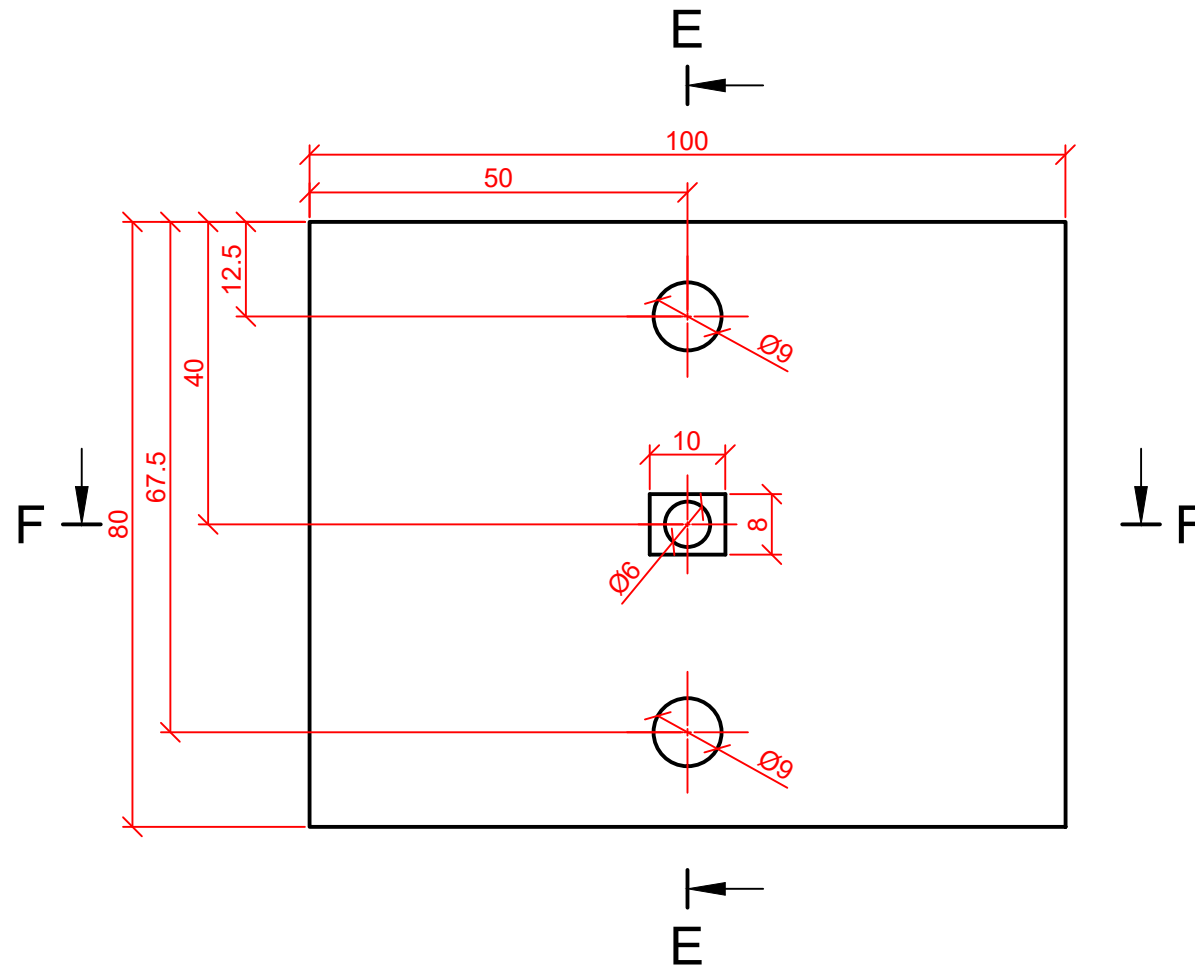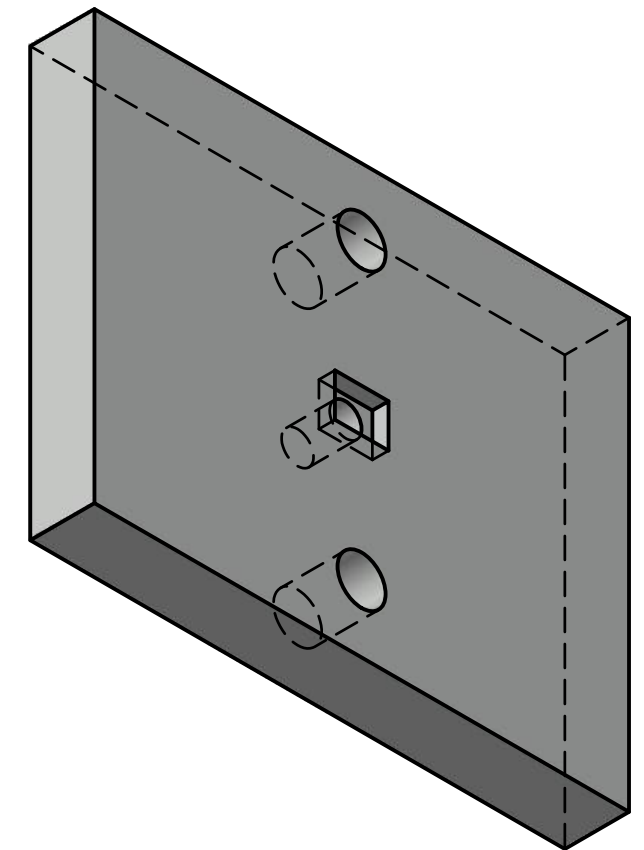

F-F (1:1)

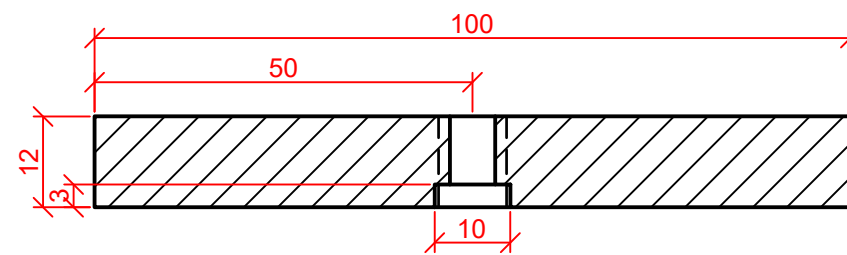

|                                                                                         |                |                                                                      |                              |
|-----------------------------------------------------------------------------------------|----------------|----------------------------------------------------------------------|------------------------------|
| Scale:<br>-                                                                             |                | Format:<br>A3                                                        |                              |
| Material:<br>Stainless steel V2                                                         |                |                                                                      |                              |
| Description:<br>Three-point bending test setup for cortical bone<br>P1 - Base plate top |                |                                                                      |                              |
| Drawing number:<br>PF004-004-001                                                        | Revision:<br>4 | Original date:<br>27.02.2019                                         | Revision date:<br>10.08.2022 |
| Drawer:<br>Marc Gebhardt                                                                |                | Organisation:<br><b>HITWK</b> Leipzig University of Applied Sciences |                              |

B-B (1:1)

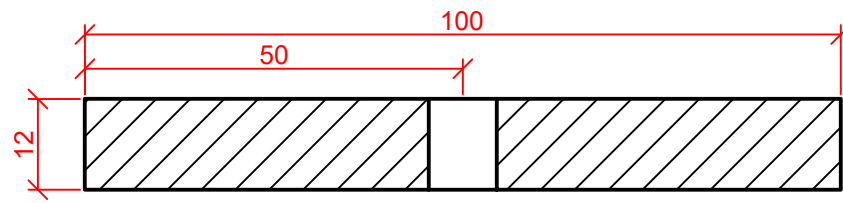

A-A (1:1)

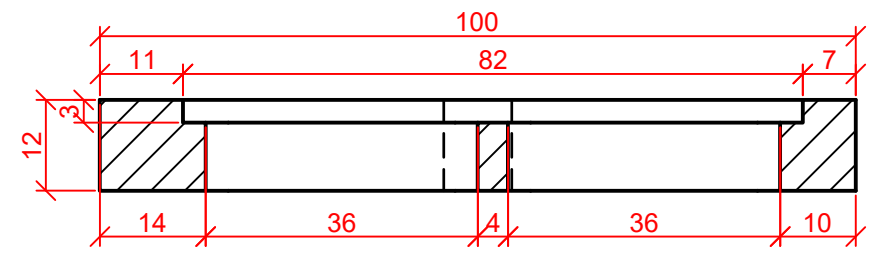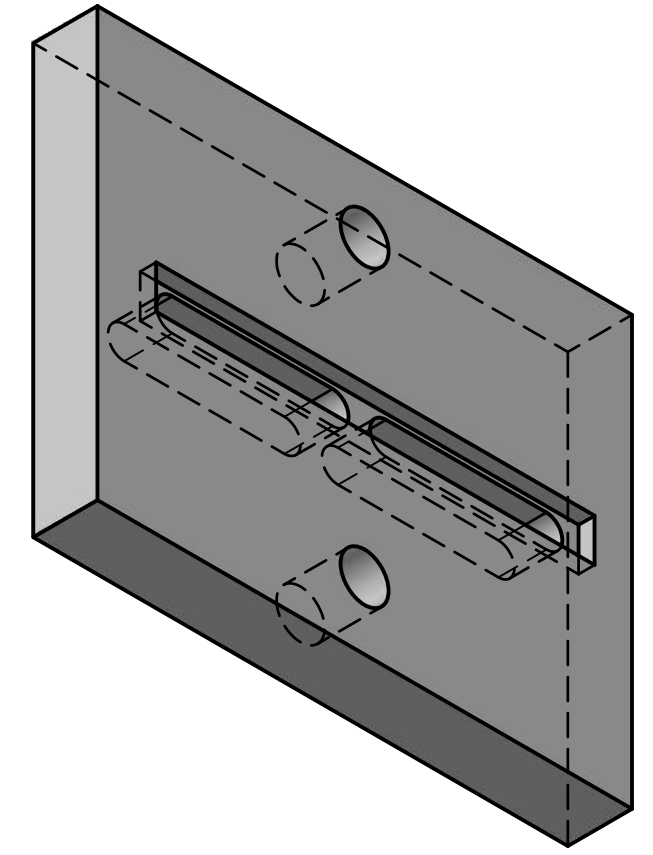

D-D (1:1)

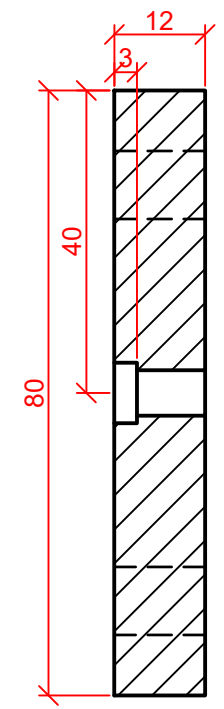

C-C (1:1)

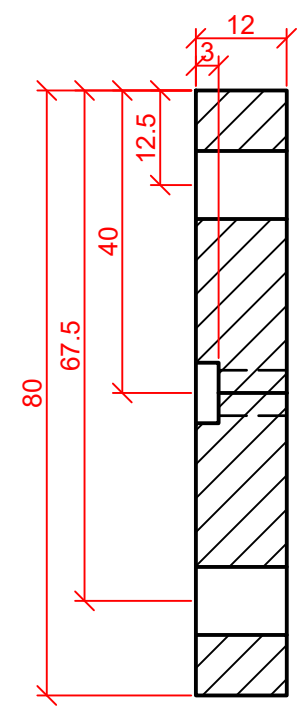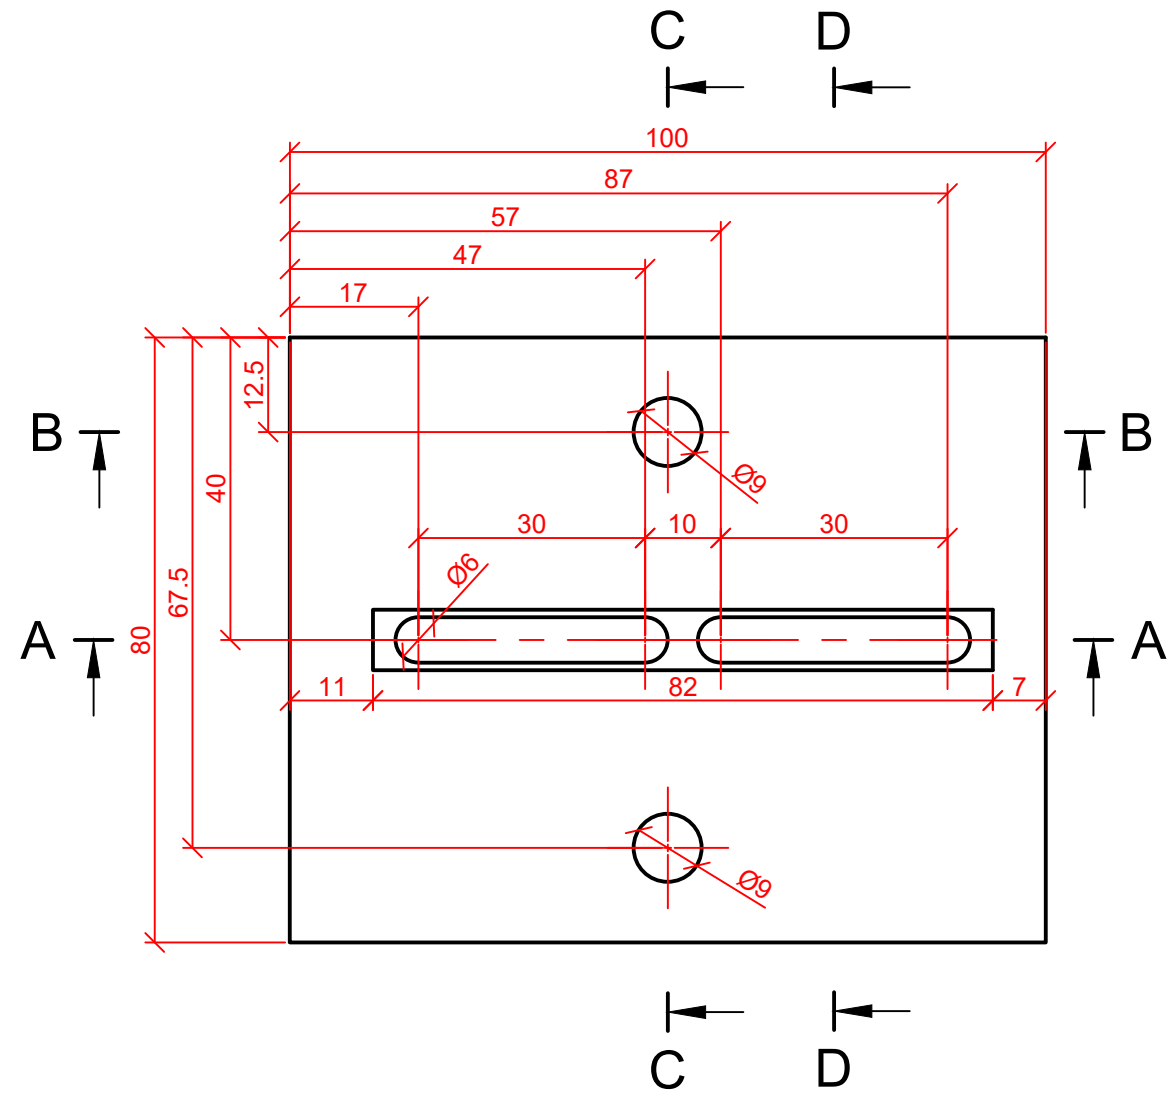

|                                                  |           |                                                    |                |
|--------------------------------------------------|-----------|----------------------------------------------------|----------------|
| Scale:                                           |           | Format:                                            |                |
| -                                                |           | A3                                                 |                |
| Material:                                        |           |                                                    |                |
| Stainless steel V2                               |           |                                                    |                |
| Description:                                     |           |                                                    |                |
| Three-point bending test setup for cortical bone |           |                                                    |                |
| P2 - Base plate bottom                           |           |                                                    |                |
| Drawing number:                                  | Revision: | Original date:                                     | Revision date: |
| PF004-004-002                                    | 4         | 27.02.2019                                         | 10.08.2022     |
| Drawer:                                          |           | Organisation:                                      |                |
| Marc Gebhardt                                    |           | <b>HTWK</b> Leipzig University of Applied Sciences |                |



X (10:1)

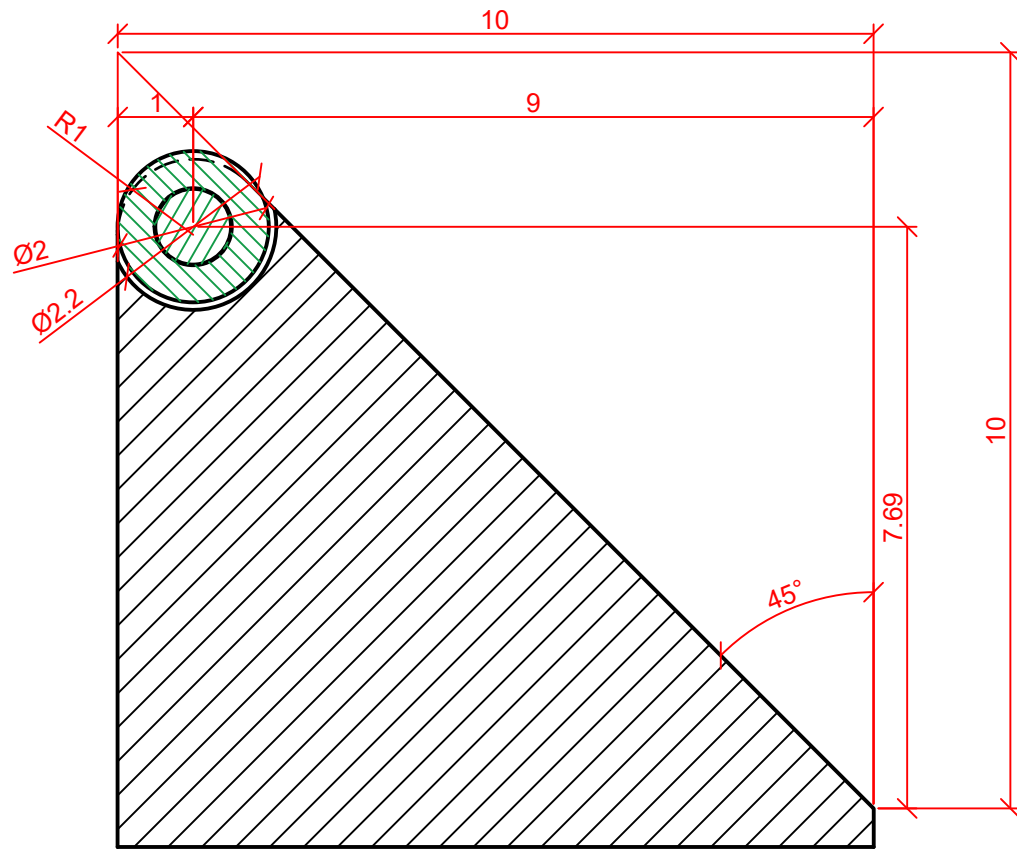

Y (10:1)

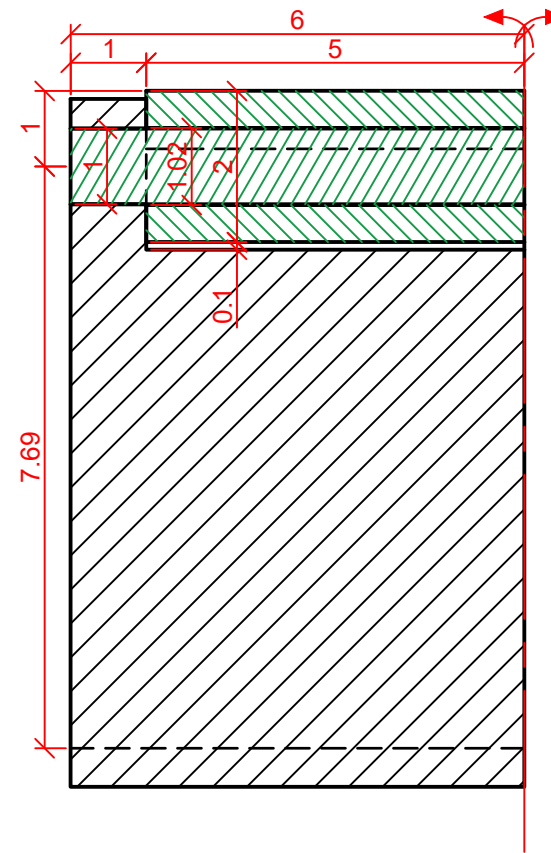

B-B (2:1)

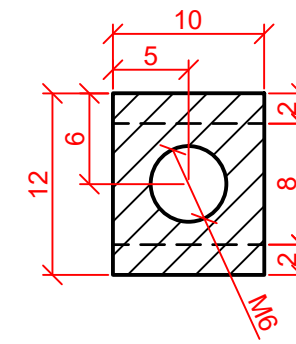

A-A (2:1)

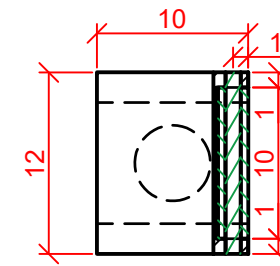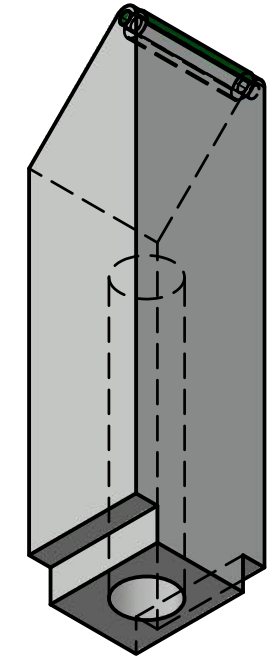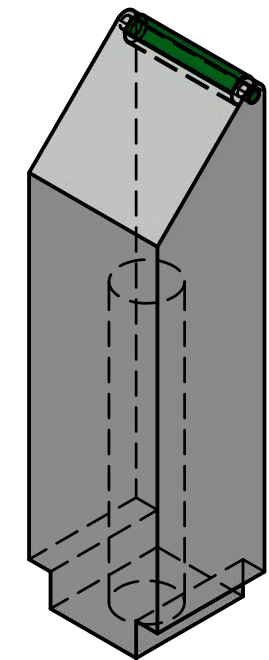

D-D (2:1)

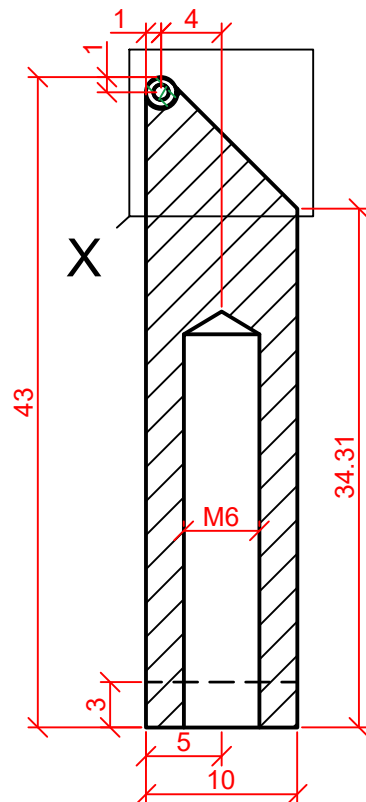

C-C (2:1)

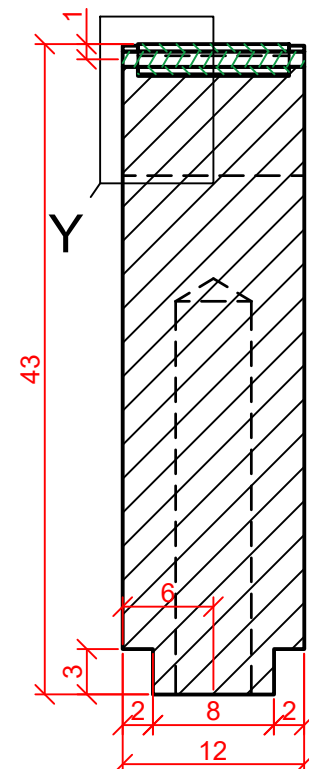

D

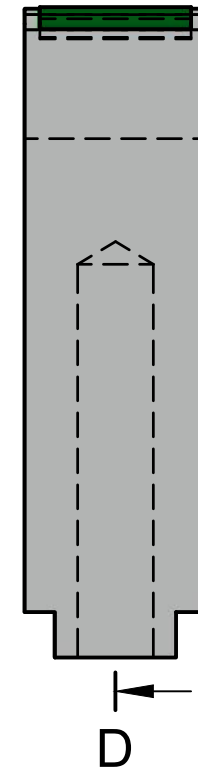

C

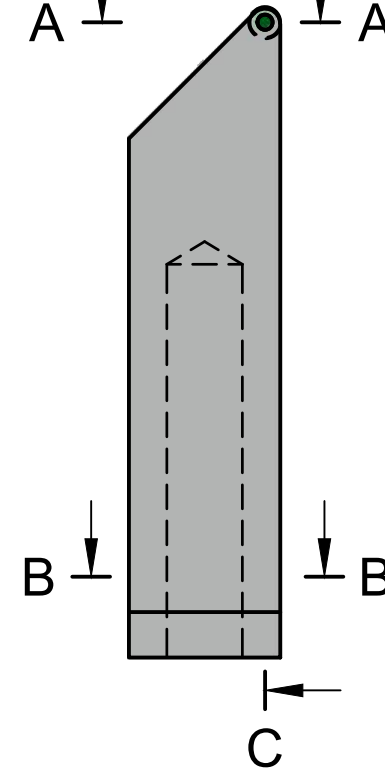

|                                                  |           |                                                                      |                |
|--------------------------------------------------|-----------|----------------------------------------------------------------------|----------------|
| Scale:                                           |           | Format:                                                              |                |
| -                                                |           | A3                                                                   |                |
| Material:                                        |           |                                                                      |                |
| Stainless steel V2                               |           |                                                                      |                |
| Description:                                     |           |                                                                      |                |
| Three-point bending test setup for cortical bone |           |                                                                      |                |
| P4 - Stamp fixed                                 |           |                                                                      |                |
| Drawing number:                                  | Revision: | Original date:                                                       | Revision date: |
| PF004-004-004                                    | 4         | 27.02.2019                                                           | 10.08.2022     |
| Drawer:                                          |           | Organisation:                                                        |                |
| Marc Gebhardt                                    |           | <b>HTWK</b><br><small>Leipzig University of Applied Sciences</small> |                |

## 2. Additional evaluation results

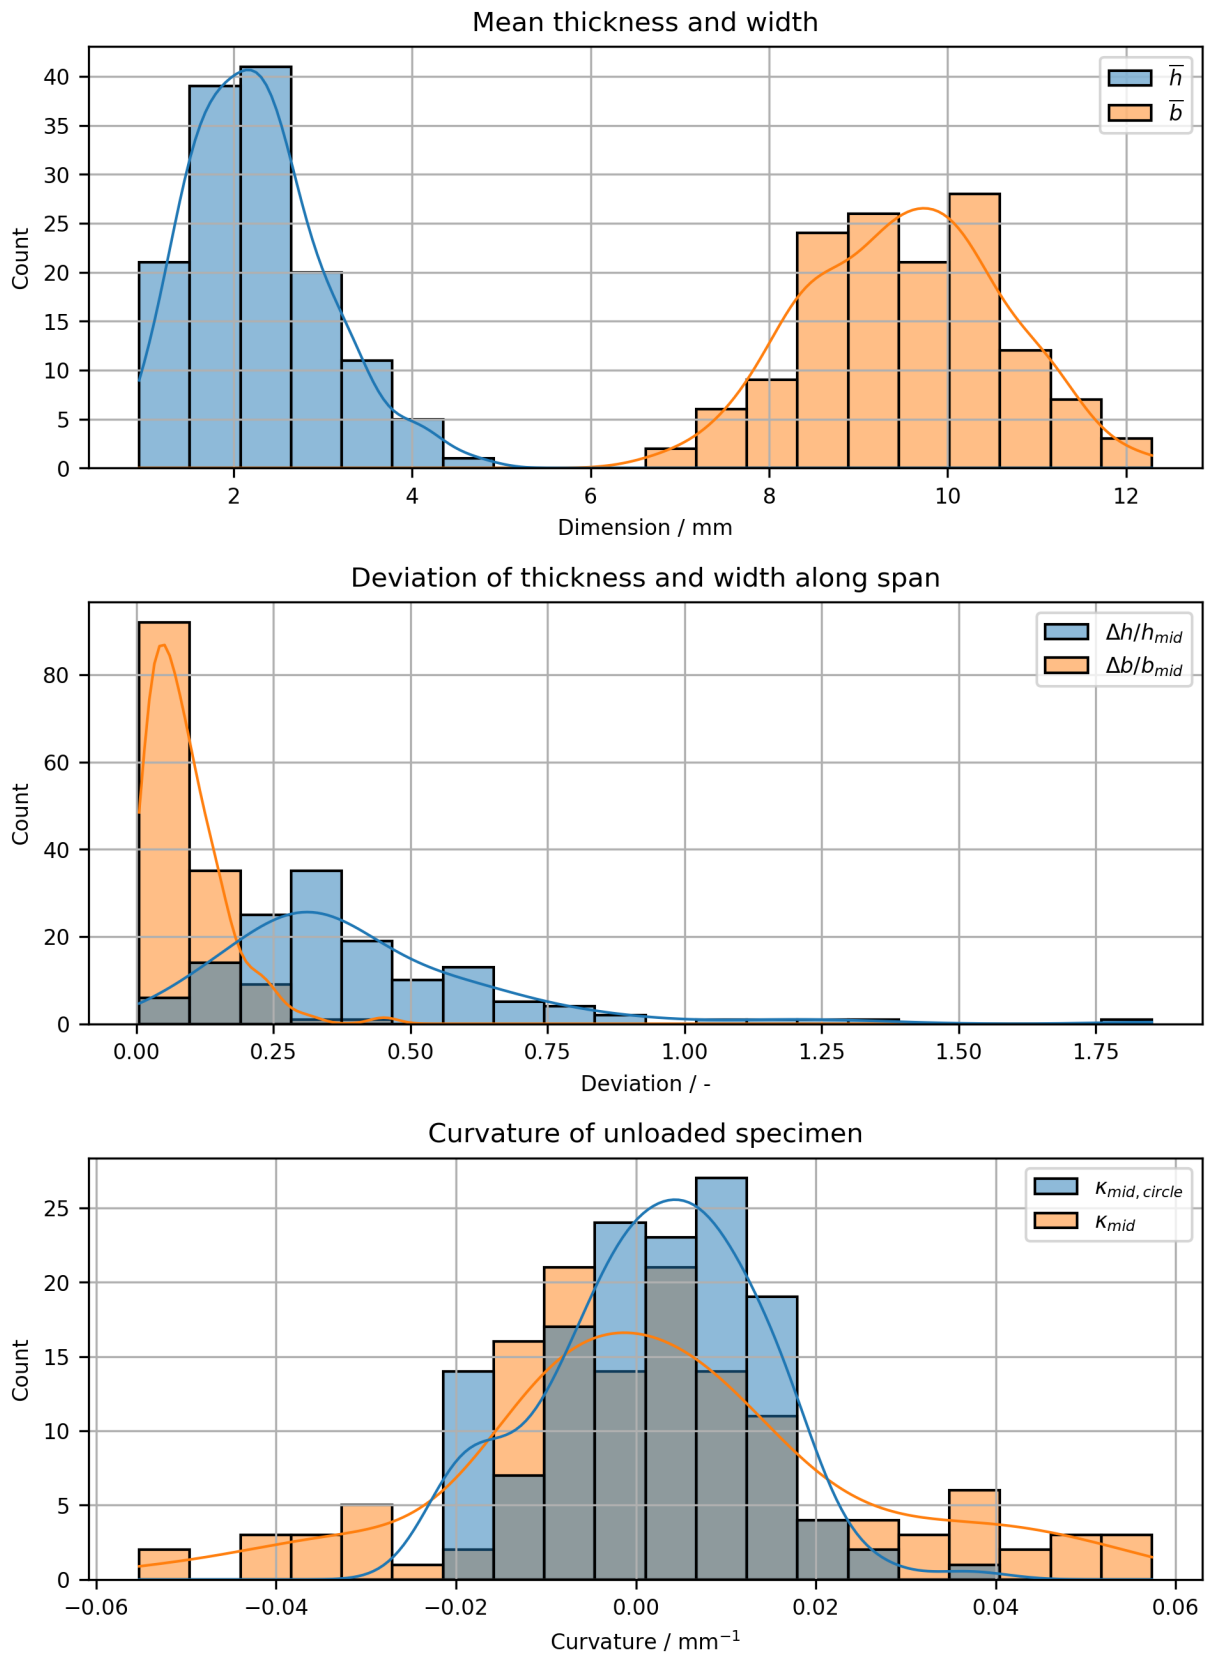

Figure 1: Distribution of geometrical properties ( $\Delta h/h_{mid}$ : difference between maximum and minimum height divided by the height at midspan, width accordingly,  $\kappa_{mid, circle}$ : curvature of an inscribed circle,  $\kappa_{mid}$ : midspan curvature of fitted function)



Table 1: Material properties

| Parameter                | Unit                 | Minimum | Maximum | Average       | Median | Standard deviation | Coefficient of variation in [-] | Confidence interval minimum | Confidence interval maximum |
|--------------------------|----------------------|---------|---------|---------------|--------|--------------------|---------------------------------|-----------------------------|-----------------------------|
| Apparent density         | [g/cm <sup>3</sup> ] | 0.986   | 1.866   | <u>1.463</u>  | 1.459  | 0.187              | 0.128                           | 1.430                       | 1.492                       |
| Yield strength           | [MPa]                | 1.449   | 95.754  | <u>22.645</u> | 17.382 | 16.916             | 0.747                           | 19.749                      | 25.306                      |
| Strain (yield)           | [%]                  | 0.404   | 3.839   | <u>1.646</u>  | 1.608  | 0.462              | 0.281                           | 1.572                       | 1.726                       |
| External work (yield)    | [mJ]                 | 0.383   | 35.227  | <u>8.594</u>  | 6.797  | 6.858              | 0.798                           | 7.471                       | 9.689                       |
| Ultimate strength        | [MPa]                | 1.954   | 106.147 | <u>28.197</u> | 23.001 | 19.727             | 0.700                           | 24.837                      | 31.212                      |
| Strain (ultimate)        | [%]                  | 0.680   | 13.812  | <u>3.940</u>  | 3.542  | 1.779              | 0.451                           | 3.671                       | 4.246                       |
| External work (ultimate) | [mJ]                 | 2.902   | 244.207 | <u>31.538</u> | 23.254 | 28.602             | 0.907                           | 27.036                      | 36.229                      |
| Fracture strength        | [MPa]                | 1.447   | 94.716  | <u>22.947</u> | 18.634 | 16.870             | 0.735                           | 20.005                      | 25.574                      |
| Strain (fracture)        | [%]                  | 0.680   | 15.165  | <u>5.483</u>  | 5.153  | 2.288              | 0.417                           | 5.242                       | 5.665                       |
| External work (fracture) | [mJ]                 | 2.902   | 273.483 | <u>48.112</u> | 38.481 | 40.013             | 0.832                           | 42.186                      | 50.812                      |

Table 2: Statistical evaluation for selected methods (modulus of elasticity determined incrementally in refined range, with exclusion of statistical outliers on the specimen level)

| Method | Modulus of elasticity in [MPa] |         |             |        |                    |                                 |                             |                             | Coefficient of variation of evaluation range in [%] |         |             |        |                    |                                 |                             |                             |
|--------|--------------------------------|---------|-------------|--------|--------------------|---------------------------------|-----------------------------|-----------------------------|-----------------------------------------------------|---------|-------------|--------|--------------------|---------------------------------|-----------------------------|-----------------------------|
|        | Minimum                        | Maximum | Average     | Median | Standard deviation | Coefficient of variation in [-] | Confidence interval minimum | Confidence interval maximum | Minimum                                             | Maximum | Average     | Median | Standard deviation | Coefficient of variation in [-] | Confidence interval minimum | Confidence interval maximum |
| A0Al   | 29                             | 4333    | <u>882</u>  | 631    | 781                | 0.885                           | 753                         | 1006                        | 2.8                                                 | 74.4    | <u>11.8</u> | 10.4   | 7.2                | 0.607                           | 10.7                        | 13.1                        |
| A2MI   | 45                             | 631862  | <u>7931</u> | 1312   | 56987              | 7.186                           | 1570                        | 18702                       | 1.9                                                 | 156.5   | <u>12.8</u> | 10.1   | 17.0               | 1.334                           | 10.5                        | 16.0                        |
| A4MI   | 40                             | 469439  | <u>6723</u> | 1257   | 44064              | 6.554                           | 1566                        | 15099                       | 1.9                                                 | 168.9   | <u>15.5</u> | 10.7   | 22.0               | 1.421                           | 12.2                        | 19.4                        |
| B1MI   | 35                             | 8337    | <u>1944</u> | 1473   | 1683               | 0.866                           | 1693                        | 2208                        | 2.6                                                 | 46.8    | <u>12.7</u> | 12.4   | 6.1                | 0.483                           | 11.8                        | 13.8                        |
| B2MI   | 41                             | 6669    | <u>1610</u> | 1205   | 1388               | 0.862                           | 1385                        | 1815                        | 1.4                                                 | 43.5    | <u>11.1</u> | 10.3   | 4.9                | 0.443                           | 10.3                        | 12.0                        |
| C2MI   | 47                             | 6335    | <u>1708</u> | 1281   | 1425               | 0.834                           | 1475                        | 1926                        | 5.0                                                 | 26.3    | <u>10.6</u> | 9.9    | 3.2                | 0.303                           | 10.0                        | 11.2                        |
| C2Cl   | 45                             | 6357    | <u>1721</u> | 1293   | 1440               | 0.836                           | 1488                        | 1942                        | 4.7                                                 | 25.7    | <u>10.6</u> | 9.8    | 3.4                | 0.322                           | 10.0                        | 11.3                        |
| D1Mguw | 48                             | 6495    | <u>1738</u> | 1342   | 1431               | 0.823                           | 1502                        | 1960                        | 4.5                                                 | 26.4    | <u>10.7</u> | 9.7    | 4.0                | 0.372                           | 10.1                        | 11.4                        |
| D1Mgwt | 47                             | 6454    | <u>1739</u> | 1308   | 1444               | 0.830                           | 1504                        | 1963                        | 4.2                                                 | 25.8    | <u>10.3</u> | 9.6    | 3.4                | 0.328                           | 9.8                         | 11.0                        |
| D2Mguw | 50                             | 6543    | <u>1786</u> | 1349   | 1471               | 0.824                           | 1543                        | 2012                        | 2.2                                                 | 26.4    | <u>10.5</u> | 9.8    | 3.4                | 0.323                           | 9.9                         | 11.1                        |
| D2Mgwt | 48                             | 6455    | <u>1748</u> | 1318   | 1448               | 0.829                           | 1511                        | 1971                        | 4.1                                                 | 26.3    | <u>10.5</u> | 9.9    | 3.3                | 0.313                           | 10.0                        | 11.2                        |
| E4MI   | 42                             | 7737    | <u>1747</u> | 1285   | 1540               | 0.882                           | 1492                        | 1982                        | 1.3                                                 | 113.2   | <u>12.1</u> | 10.4   | 10.5               | 0.862                           | 10.7                        | 14.0                        |
| E4Me   | 41                             | 6110    | <u>1366</u> | 961    | 1256               | 0.920                           | 1168                        | 1565                        | 2.5                                                 | 49.7    | <u>13.0</u> | 11.8   | 6.4                | 0.491                           | 12.0                        | 14.1                        |
| E4Mg   | 42                             | 5940    | <u>1486</u> | 1085   | 1279               | 0.861                           | 1277                        | 1681                        | 2.4                                                 | 31.4    | <u>11.7</u> | 11.0   | 4.8                | 0.408                           | 10.9                        | 12.5                        |
| F4Mgha | 44                             | 26540   | <u>2086</u> | 1406   | 2725               | 1.306                           | 1671                        | 2585                        | 2.3                                                 | 1216.2  | <u>21.9</u> | 9.9    | 103.9              | 4.749                           | 11.1                        | 40.5                        |
| F4Mgth | 41                             | 6854    | <u>1715</u> | 1285   | 1451               | 0.846                           | 1469                        | 1945                        | 1.4                                                 | 104.6   | <u>12.8</u> | 10.3   | 12.4               | 0.975                           | 10.9                        | 14.8                        |
| G3Mg   | 45                             | 6063    | <u>1574</u> | 1171   | 1351               | 0.858                           | 1355                        | 1782                        | 2.9                                                 | 28.1    | <u>11.6</u> | 11.1   | 4.5                | 0.390                           | 10.9                        | 12.4                        |
| G3Cg   | 43                             | 5826    | <u>1504</u> | 1095   | 1286               | 0.855                           | 1296                        | 1702                        | 3.0                                                 | 26.9    | <u>11.6</u> | 10.9   | 4.5                | 0.389                           | 10.8                        | 12.3                        |



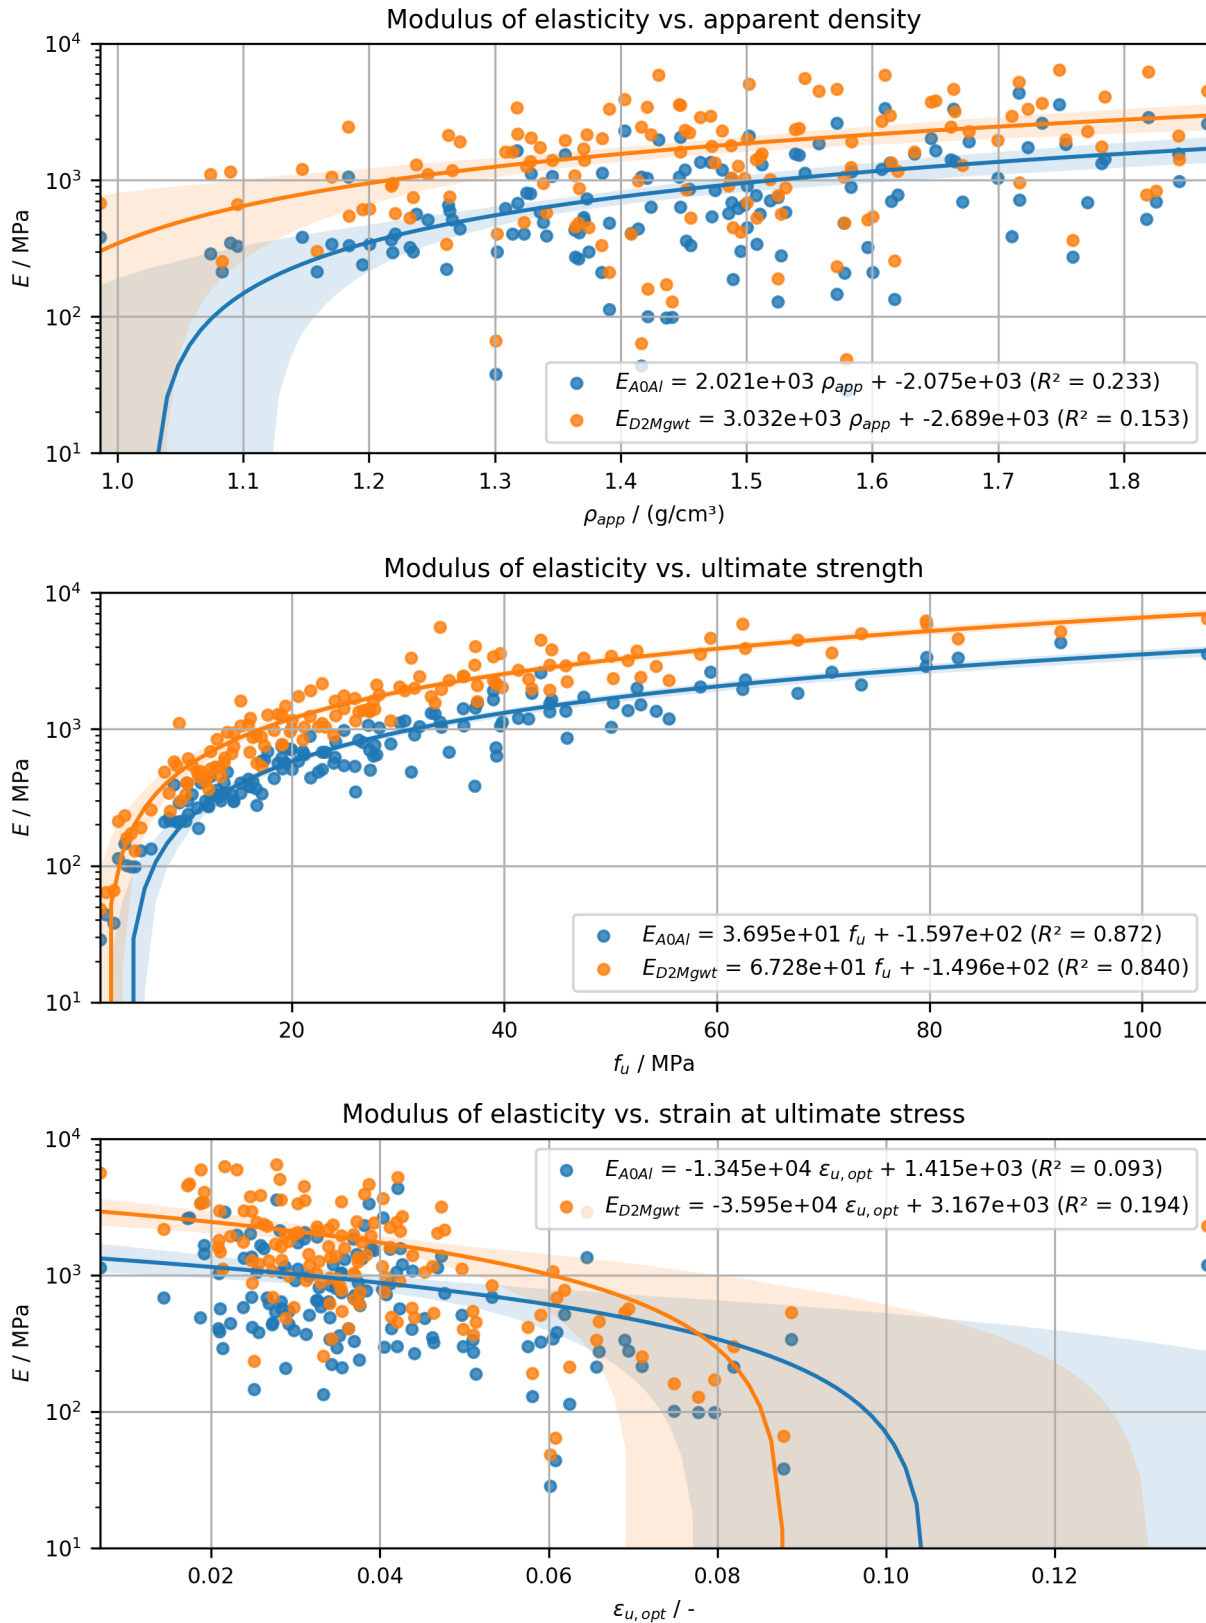

Figure 3: Correlation diagrams with linear regressions for moduli of elasticity incrementally in refined range determined by Methods A0AI and D2Mgwt; confidence intervals determined by bootstrapping for a confidence level of 95 %.

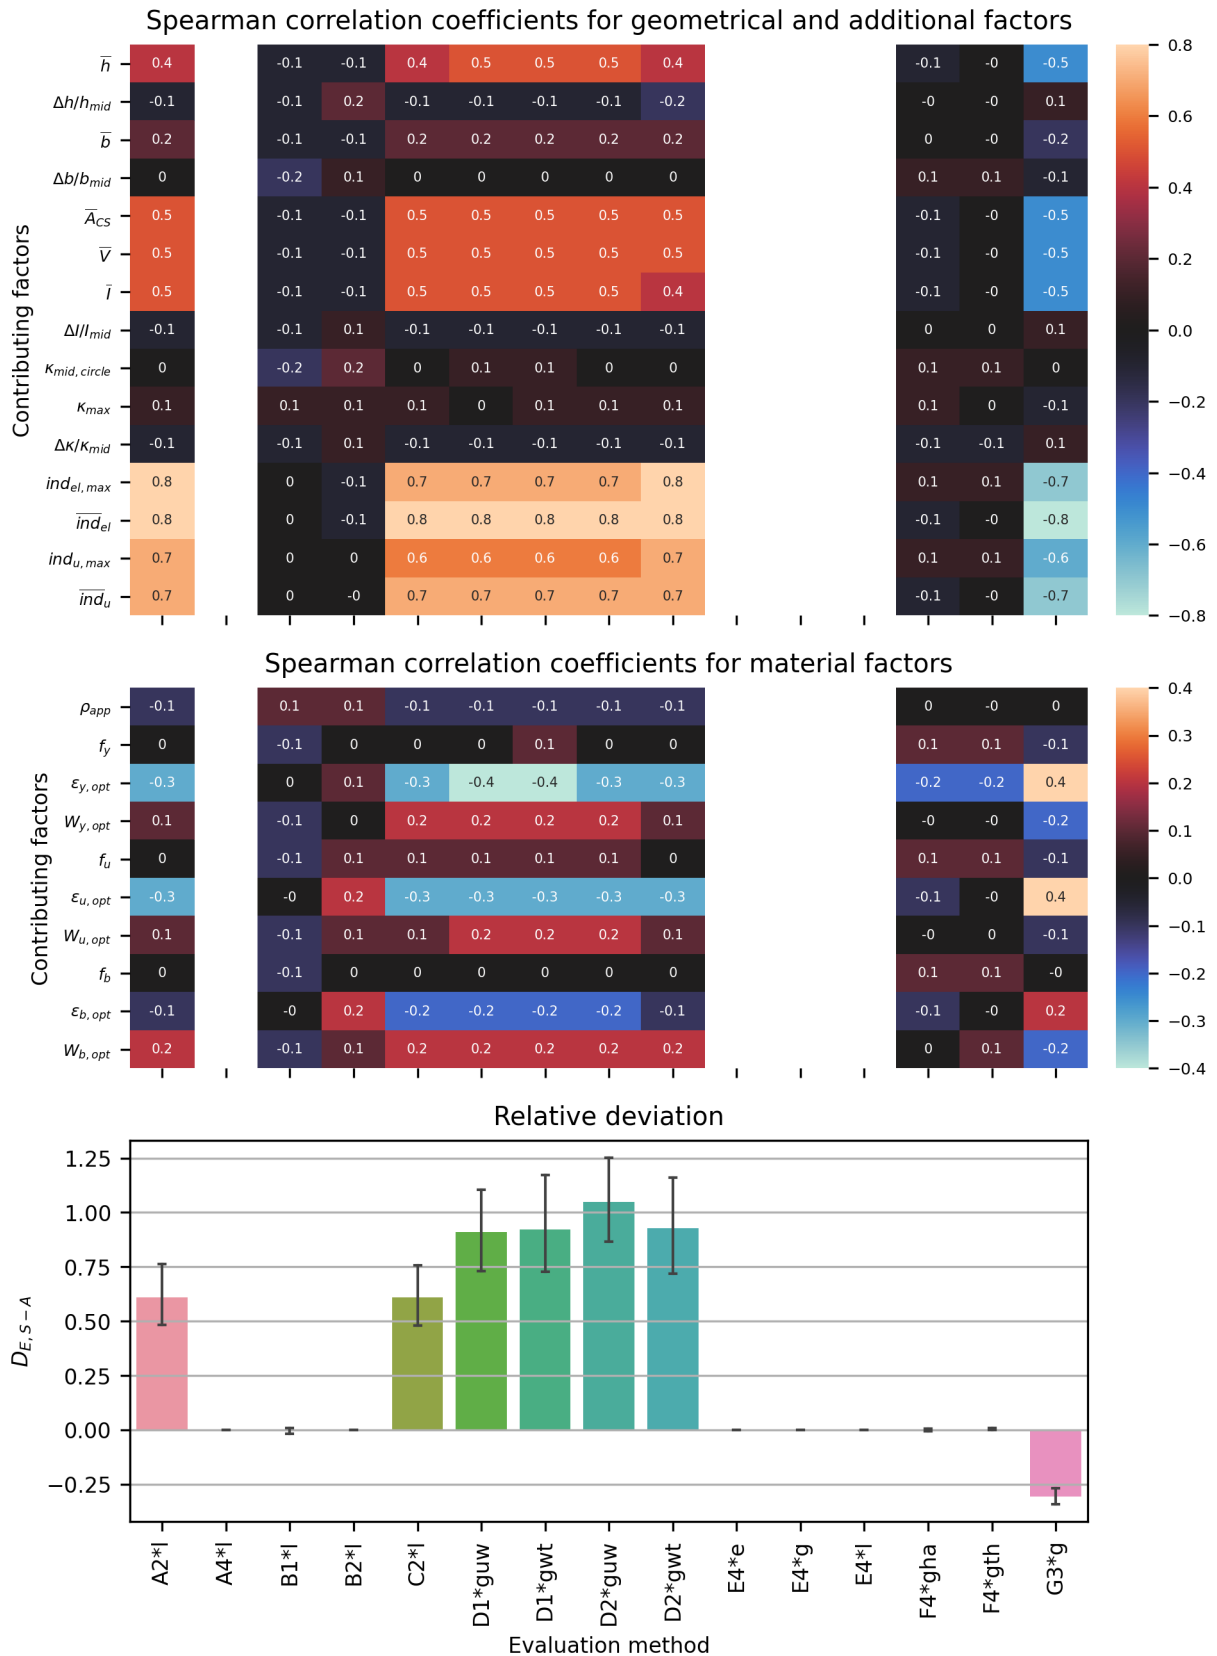

Figure 4: Influences on the moduli of elasticity determined without (\*\*A\*) and with (\*\*S\*) elimination of the support indentation, confidence intervals determined by bootstrapping for a confidence level of 95 %.

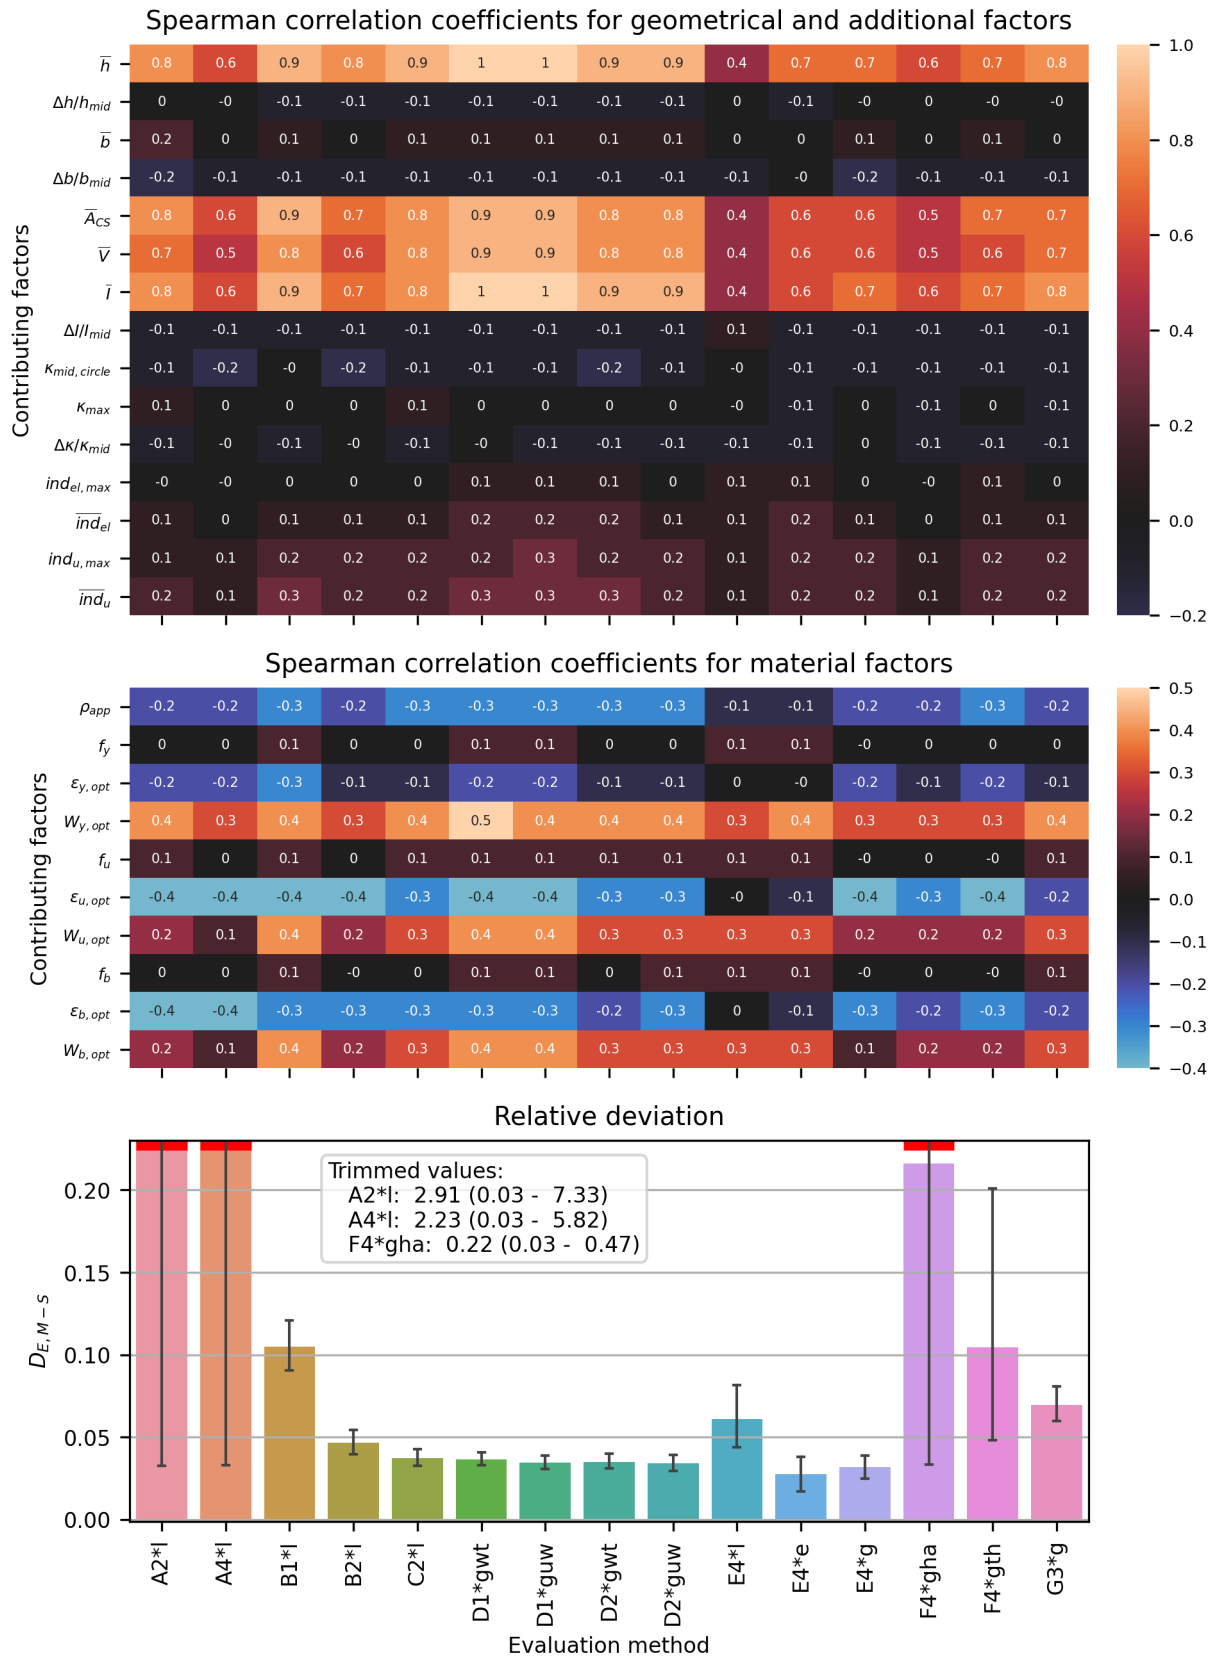

Figure 5: Influences on the moduli of elasticity determined without (\*\*S\*) and with (\*\*M\*) elimination of the shear deformation, with support indentation eliminated in both cases, confidence intervals determined by bootstrapping for a confidence level of 95 %.

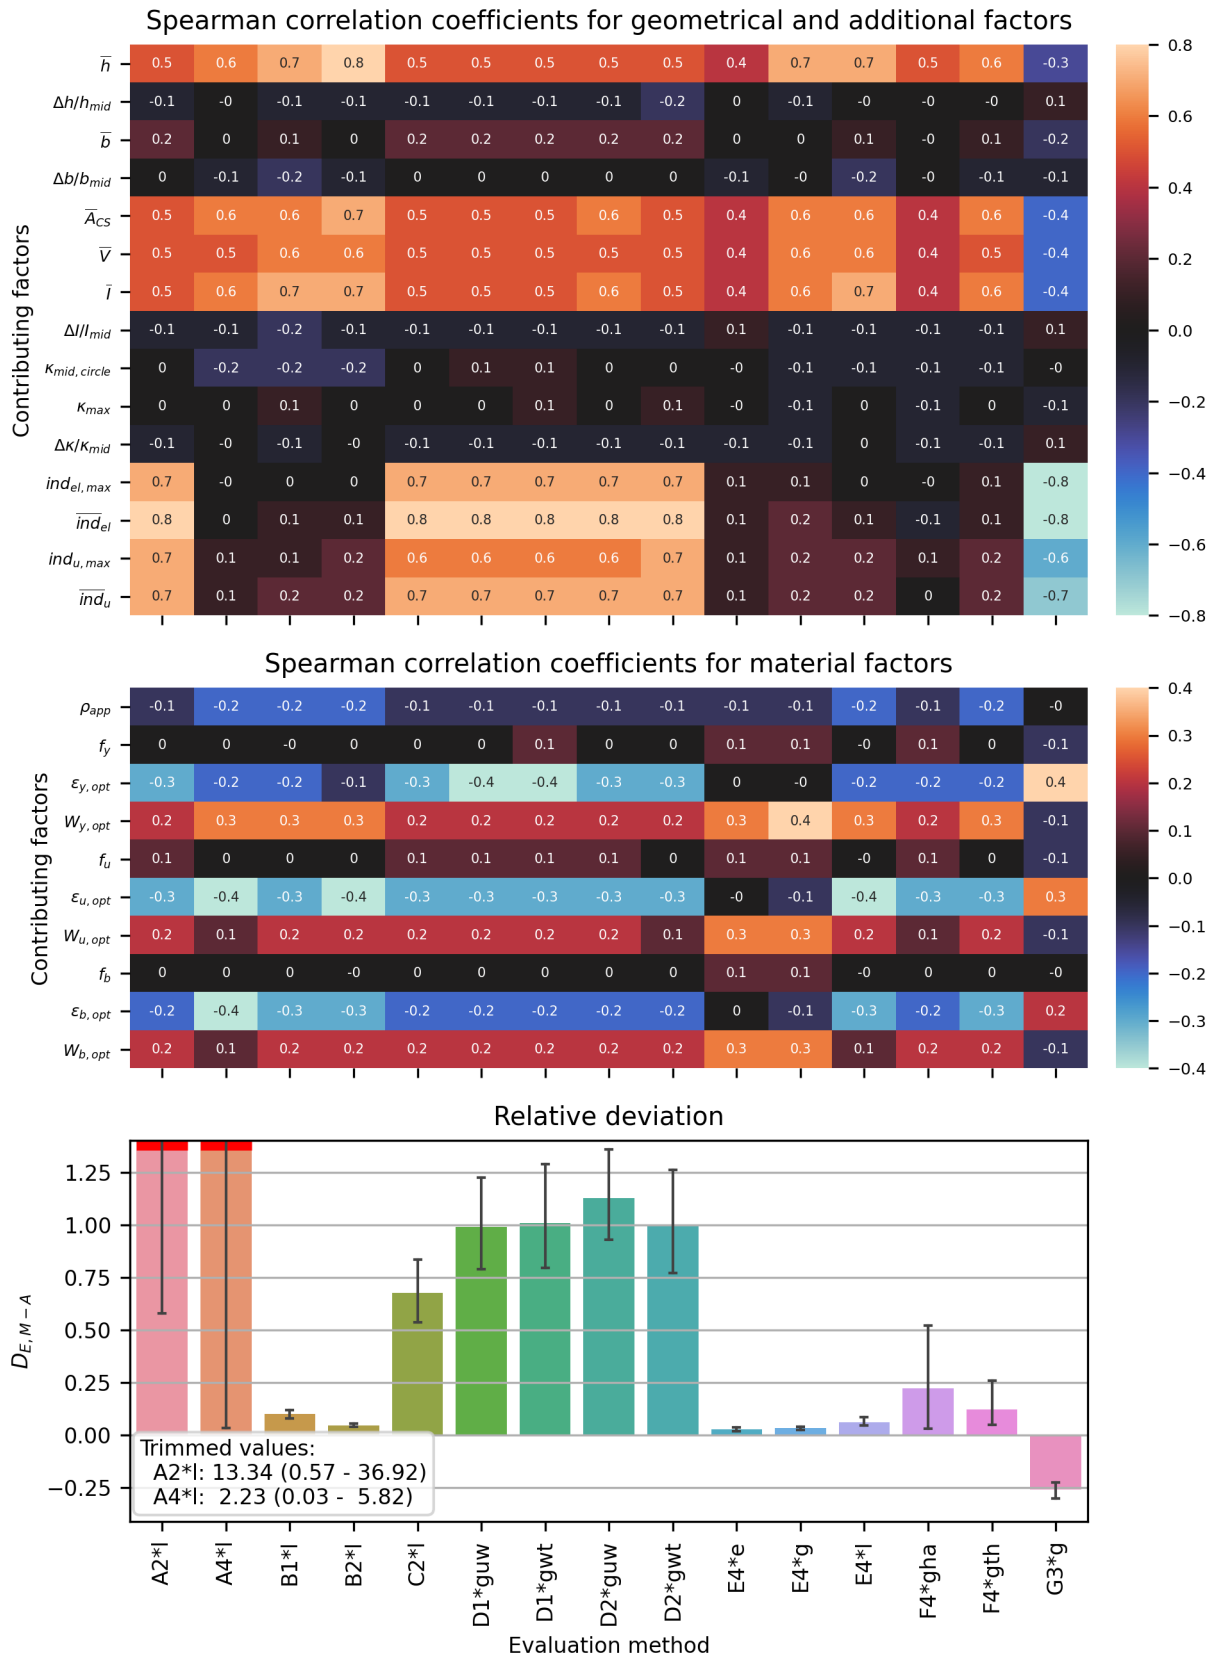

Figure 6: Influences on the moduli of elasticity determined without (\*\*A\*) and with (\*\*M\*) elimination of the shear deformation, as well as the support indentation, confidence intervals determined by bootstrapping for a confidence level of 95 %.

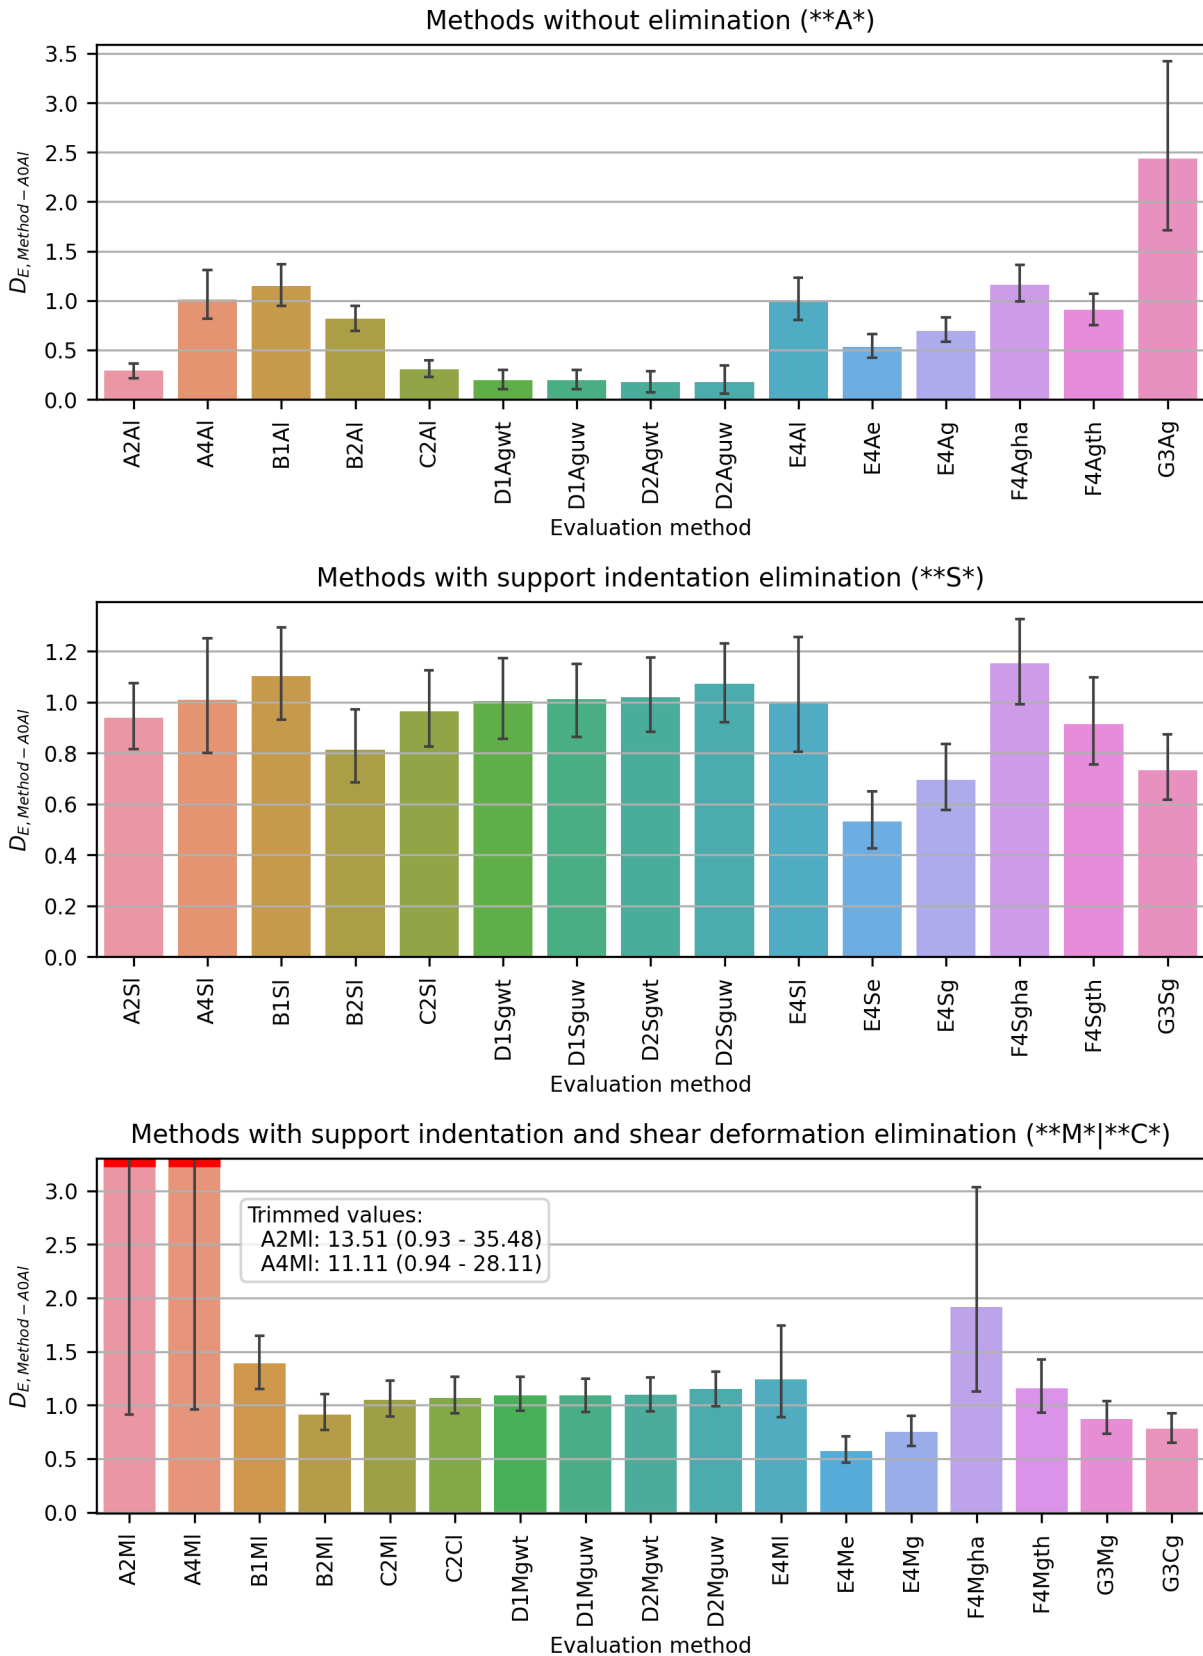

Figure 7: Relative deviation of the moduli of elasticity from the conventionally determined one (Method A0AI), confidence intervals determined by bootstrapping for a confidence level of 95 %.

### 3. Verification tests

#### 3.1. Specimens

- Two rectangular beams ( $h \times b \times l \sim 2 \times 8 \times 36 \text{ mm}^3$ ) sawed from Polymethyl methacrylate (PMMA) of unknown age
- Five test specimens with different geometry, shown in Figure 8. Manufactured by Fused Deposition Modeling (FDM) with eSun Polylactic acid (PLA) (Creality Ender 3,  $d_{\text{Nozzle}} = 0.4 \text{ mm}$ ,  $t_{\text{Layer}} = 0.2 \text{ mm}$ ,  $T_{\text{Print}} = 200 \text{ }^\circ\text{C}$ ,  $T_{\text{Base}} = 60 \text{ }^\circ\text{C}$ ).

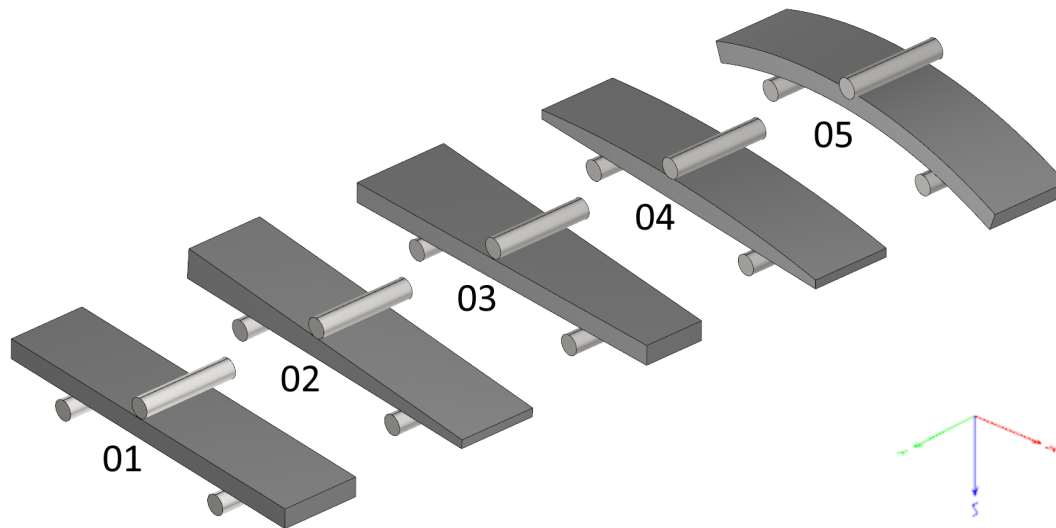

Figure 8: Shapes of the specimens made of Polylactic acid (PLA) for the verification tests schematically shown in test position A; length of the specimens 36 mm (from left to right: 01-uniform rectangular cross-section with the reference dimensions  $2 \times 8 \text{ mm}^2$  (height  $\times$  width); 02-linearly varying height, at the supports 2.6 mm and 1.4 mm; 03-linearly varying width, at the supports 9 mm and 7 mm; 04-quadratic parabola for the height, 1.8 mm at the supports and 2.2 mm at midspan; 05-curved beam with uniform cross-section (reference dimensions), constant radius of curvature 50.5 mm).

#### 3.2. Test procedure

- Elastic loading with strain limitation to 2 %
- Testing in original position (A), as well as  $180^\circ$  rotated about y-axis (B, see Figure 8)

#### 3.3. Measurement

- Optical: three cameras (middle camera with 15 mm offset), 5 Hz sampling rate
- Marking - direct:
  - STEEIRO Airbrush Kit with 0.8 mm nozzle
  - Priming with Vallejo Premium Airbrush Color – White 63.001, 4 bar air pressure, 2.5 rotations of air screw, 100 mm distance
  - Marking with Vallejo Premium Airbrush Color – Black 62.020, 2 bar air pressure, 1.0 rotation of air screw, 100 mm distance, 3-5 times

#### 3.4. Assumptions

- Poisson's ratio:
  - Polymethyl methacrylate (PMMA): 0.375
  - Polylactic acid (PLA): 0.340



### 3.5. Results

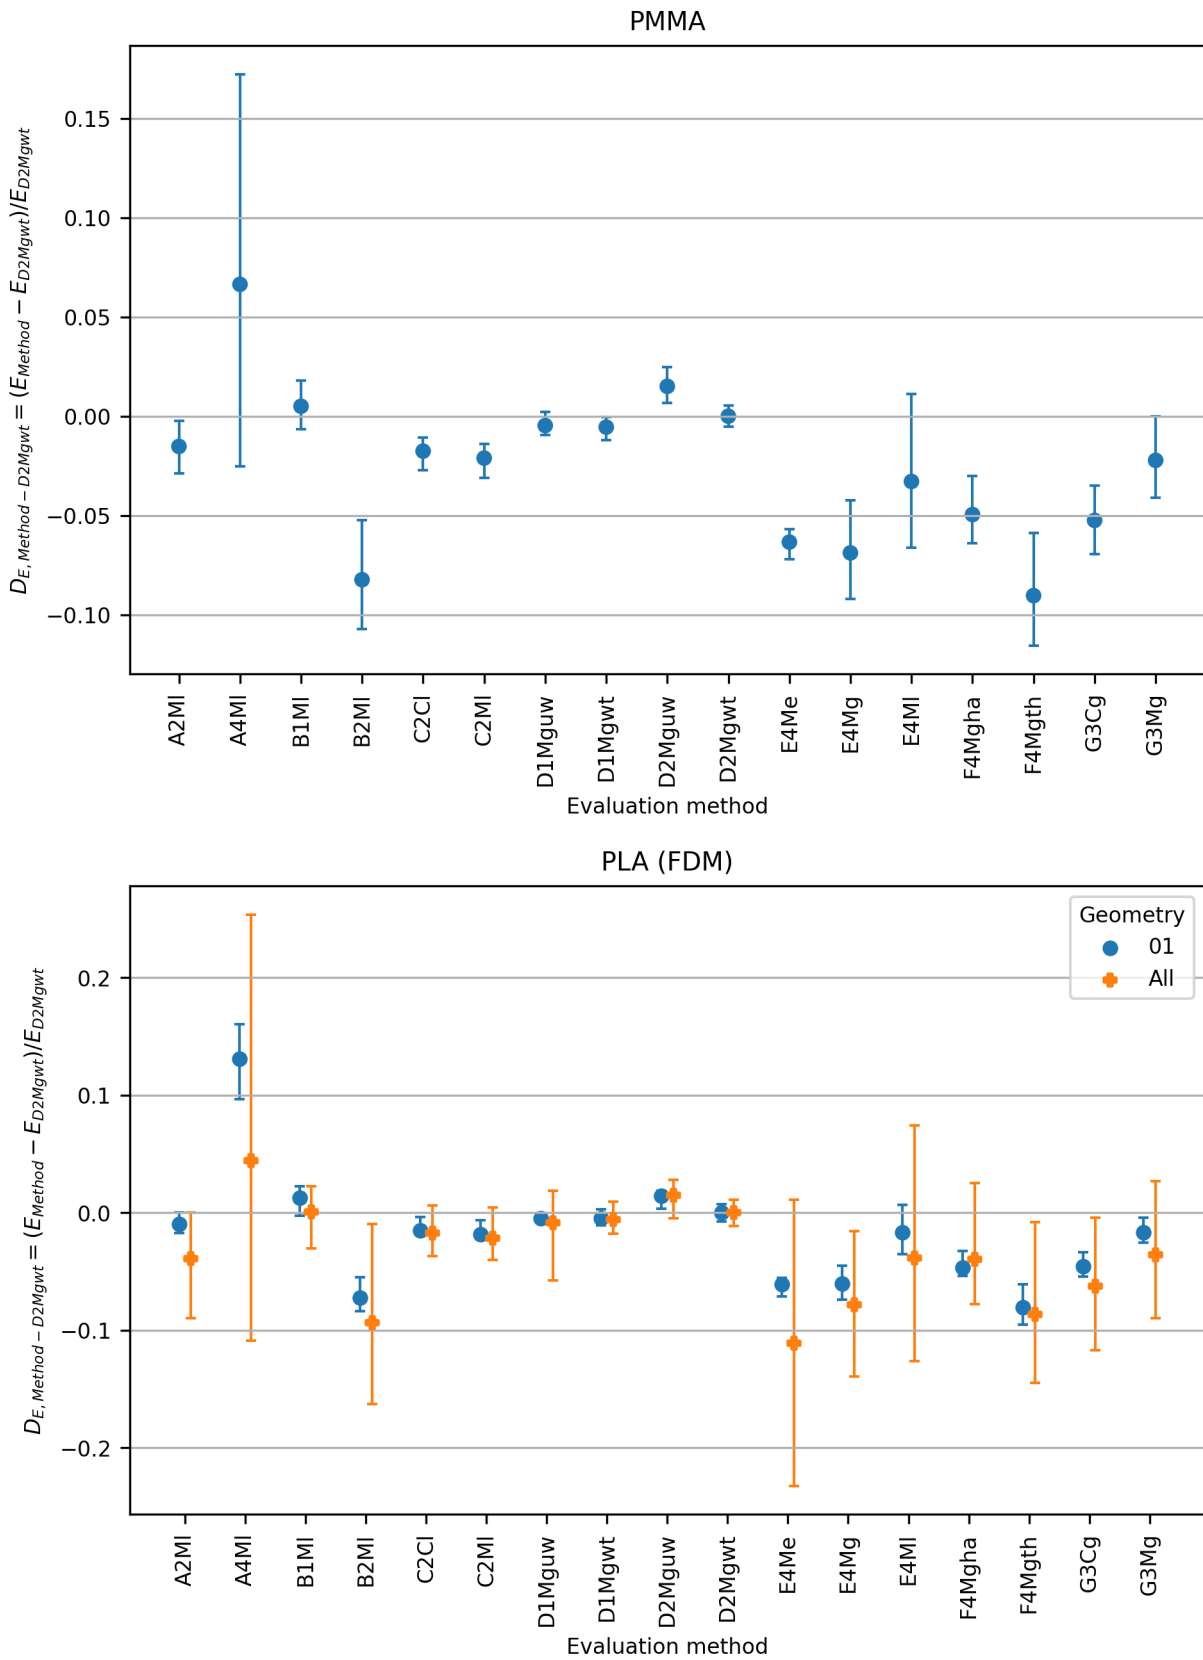

Figure 9: Verification tests – Relative deviation of the evaluation methods eliminating all falsifying influences (\*\*M\*) or correctly considering the shear deformation (\*\*C\*) from the preferred Method D2Mgwt; mean values with error bar showing minimum and maximum values.

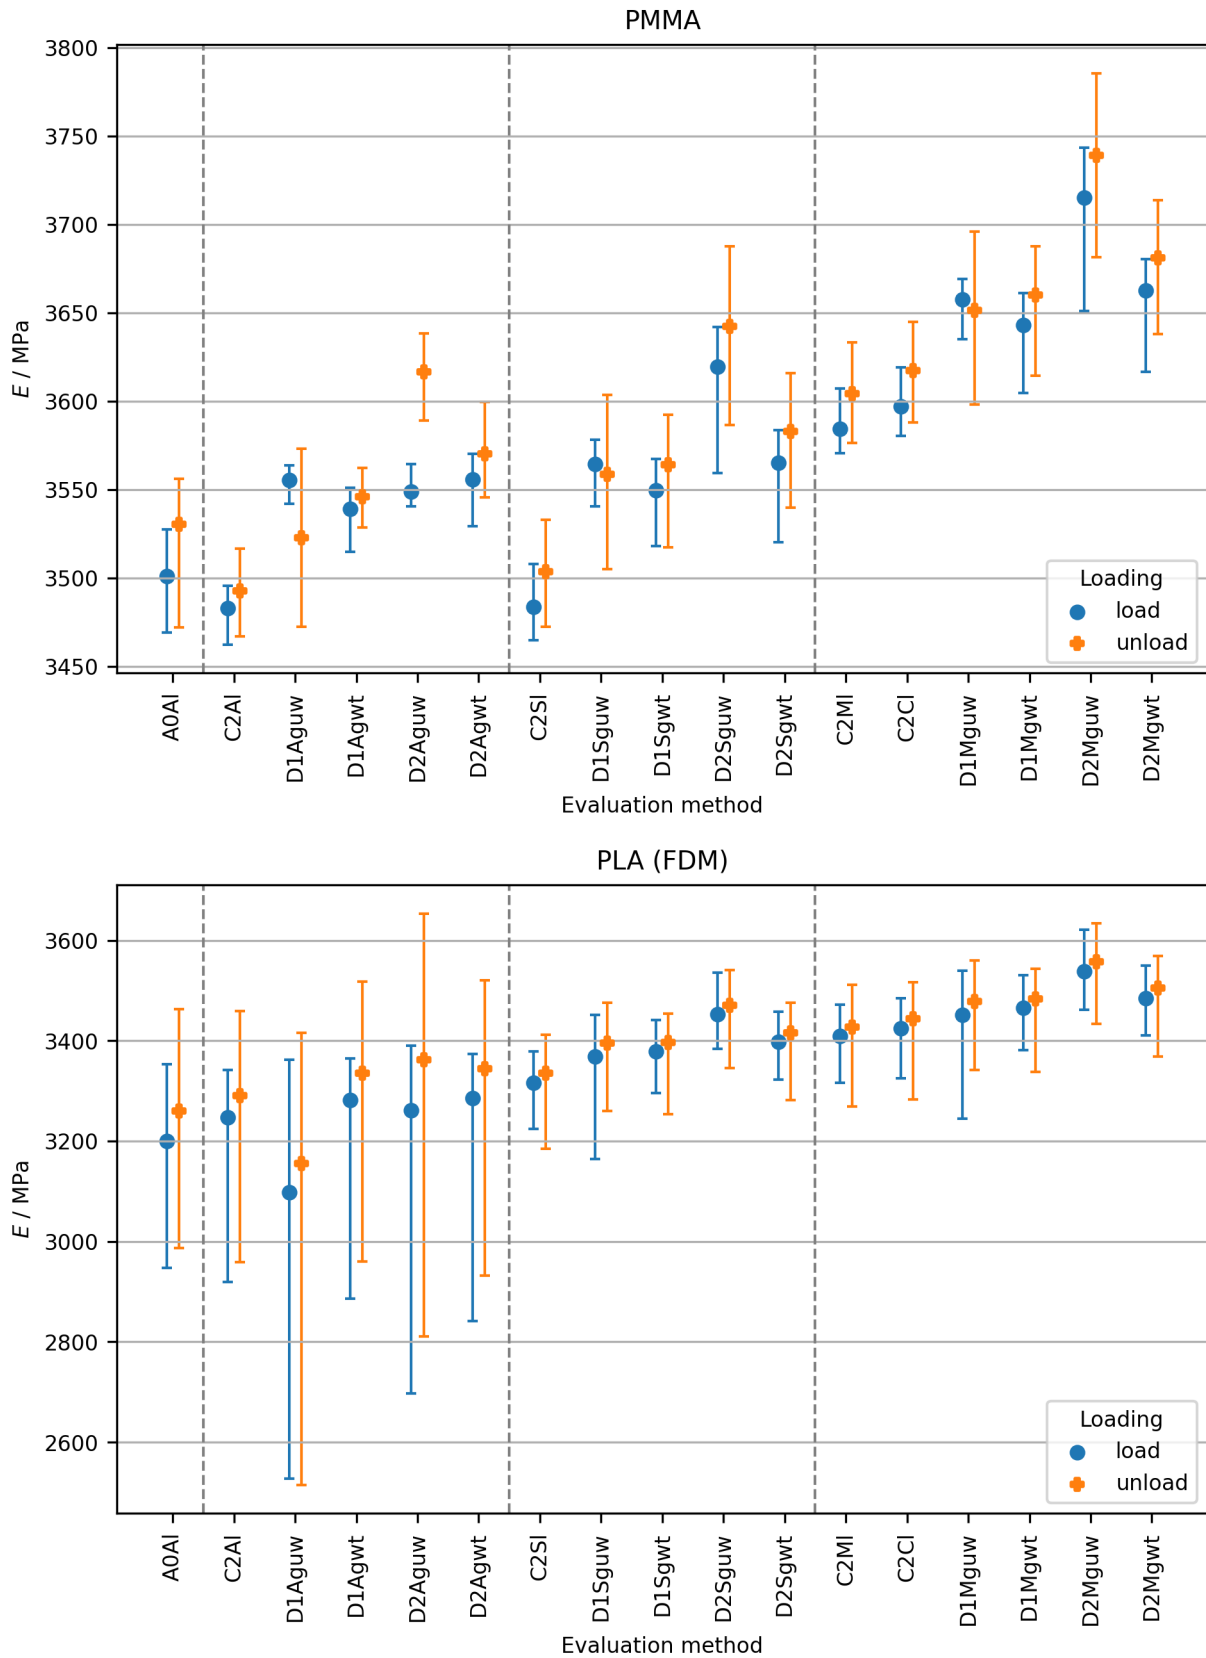

Figure 10: Verification tests - Selected moduli of elasticity for different materials and loading situations; mean values with error bar showing minimum and maximum values.

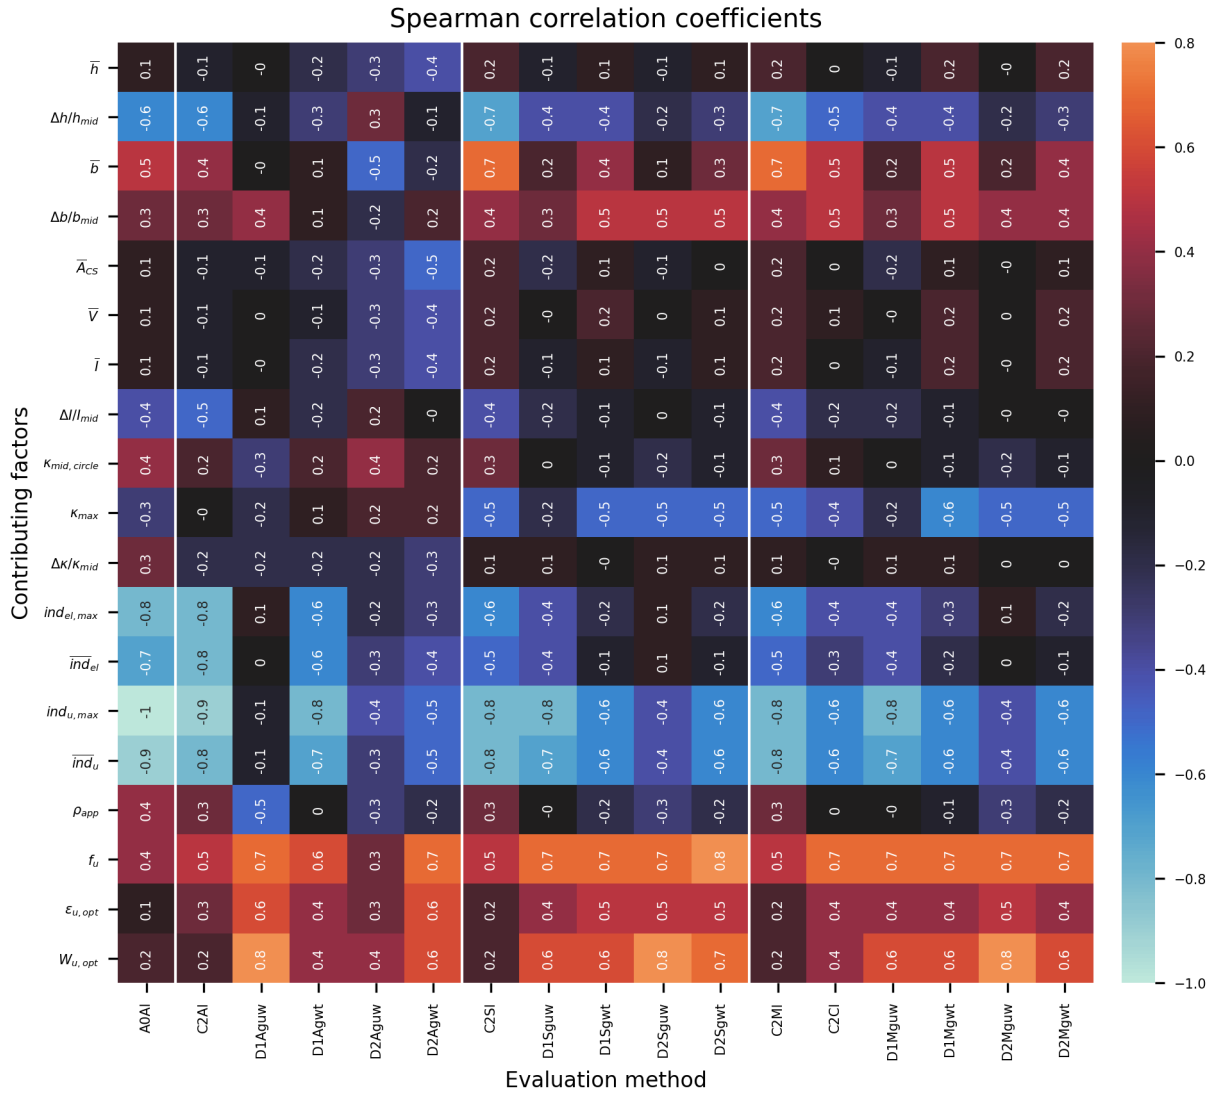

- $h$  - Thickness
- $b$  - Width
- $A_{CS}$  - Cross-section area
- $V$  - Volume
- $I$  - Second moment of inertia
- $\kappa$  - Geometrical curvature
- $ind$  - Support indentation
- $\rho_{app}$  - Apparent density
- $f$  - Strength
- $\varepsilon$  - Strain
- $W$  - External work
- $\bar{X}$  - Arithmetic average
- $\Delta X$  - Difference between max. and min.
- $X_{mid}$  - Midspan position
- $X_{circle}$  - Approximated as circle
- $X_{el}$  - Elastic range
- $X_y$  - Yield
- $X_u$  - Ultimate
- $X_{opt}$  - Determination via DIC

Figure 11: Verification tests - Influences on modulus of elasticity obtained by selected evaluation methods for PLA specimens, in loading range only.

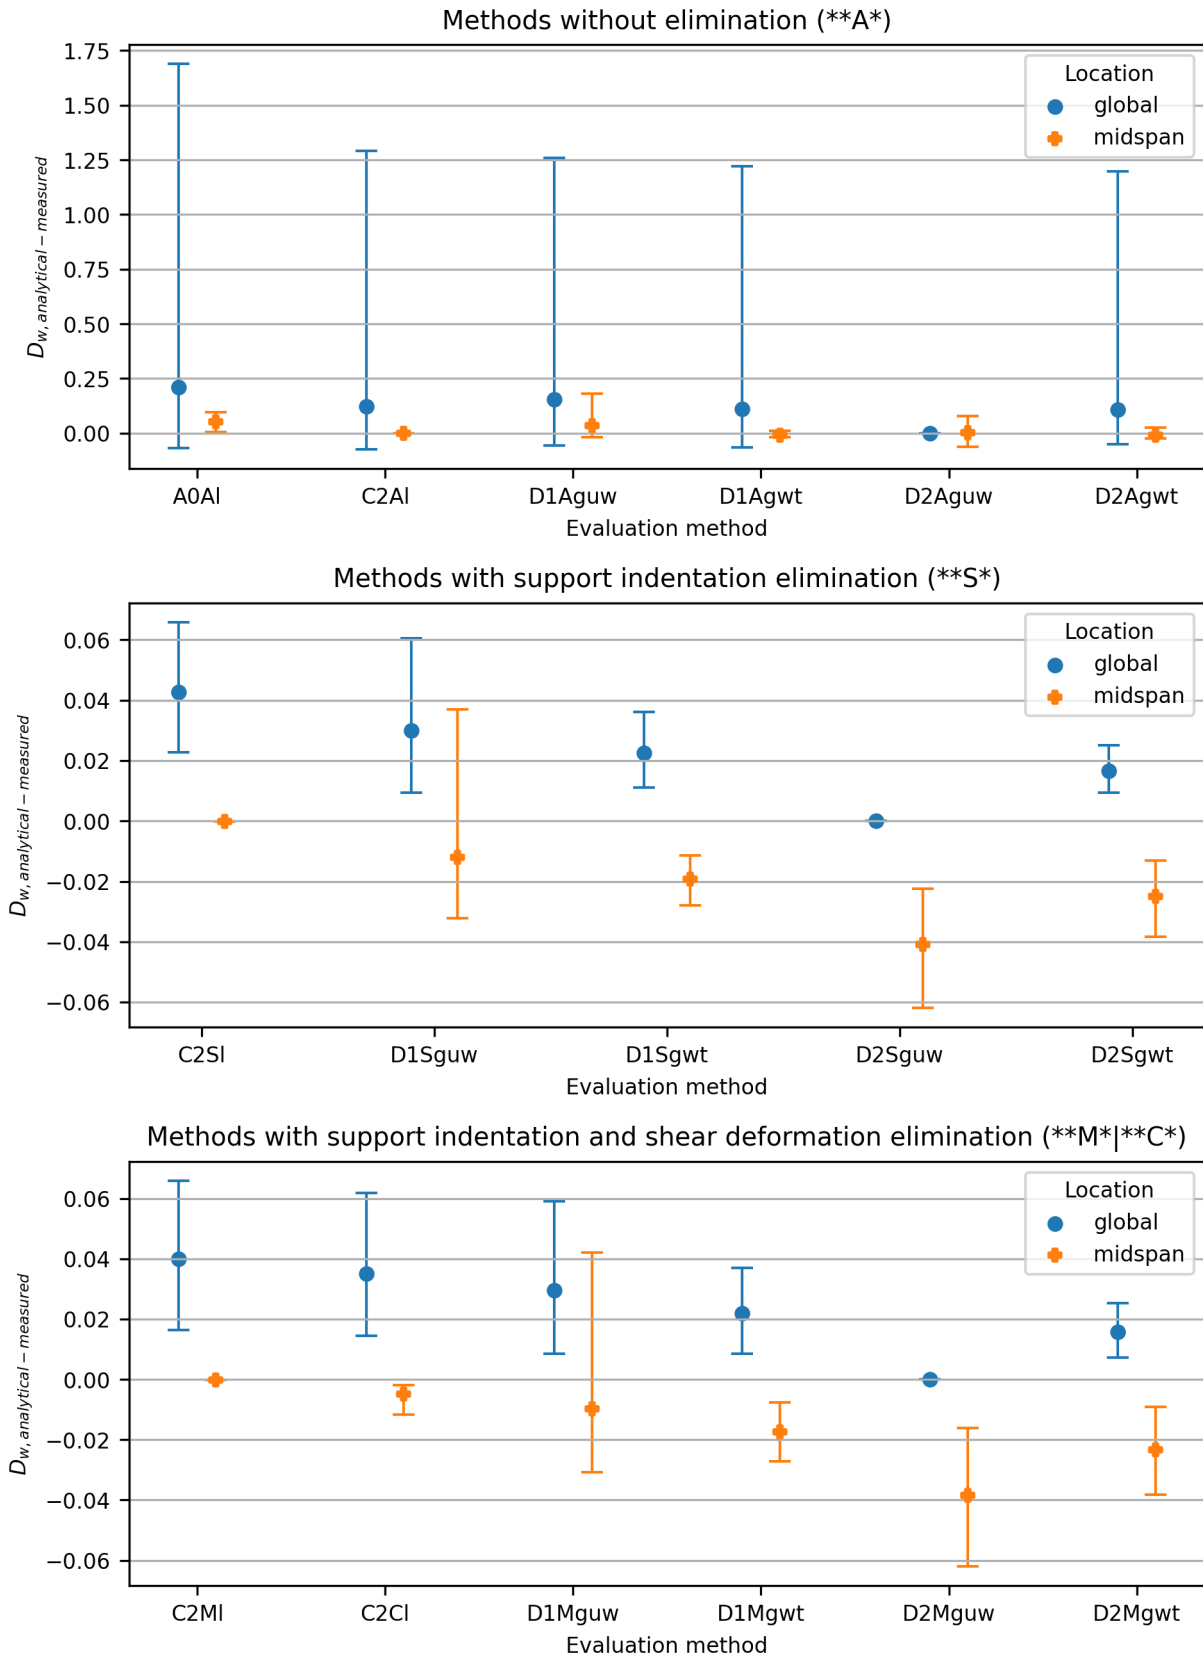

Figure 12: Verification tests - Relative deviation of the analytical elastic curve from the measured curve, where the analytical elastic curve was calculated for the modulus of elasticity obtained by different evaluation methods in loading range for the PLA specimens; mean values with error bar showing minimum and maximum values.

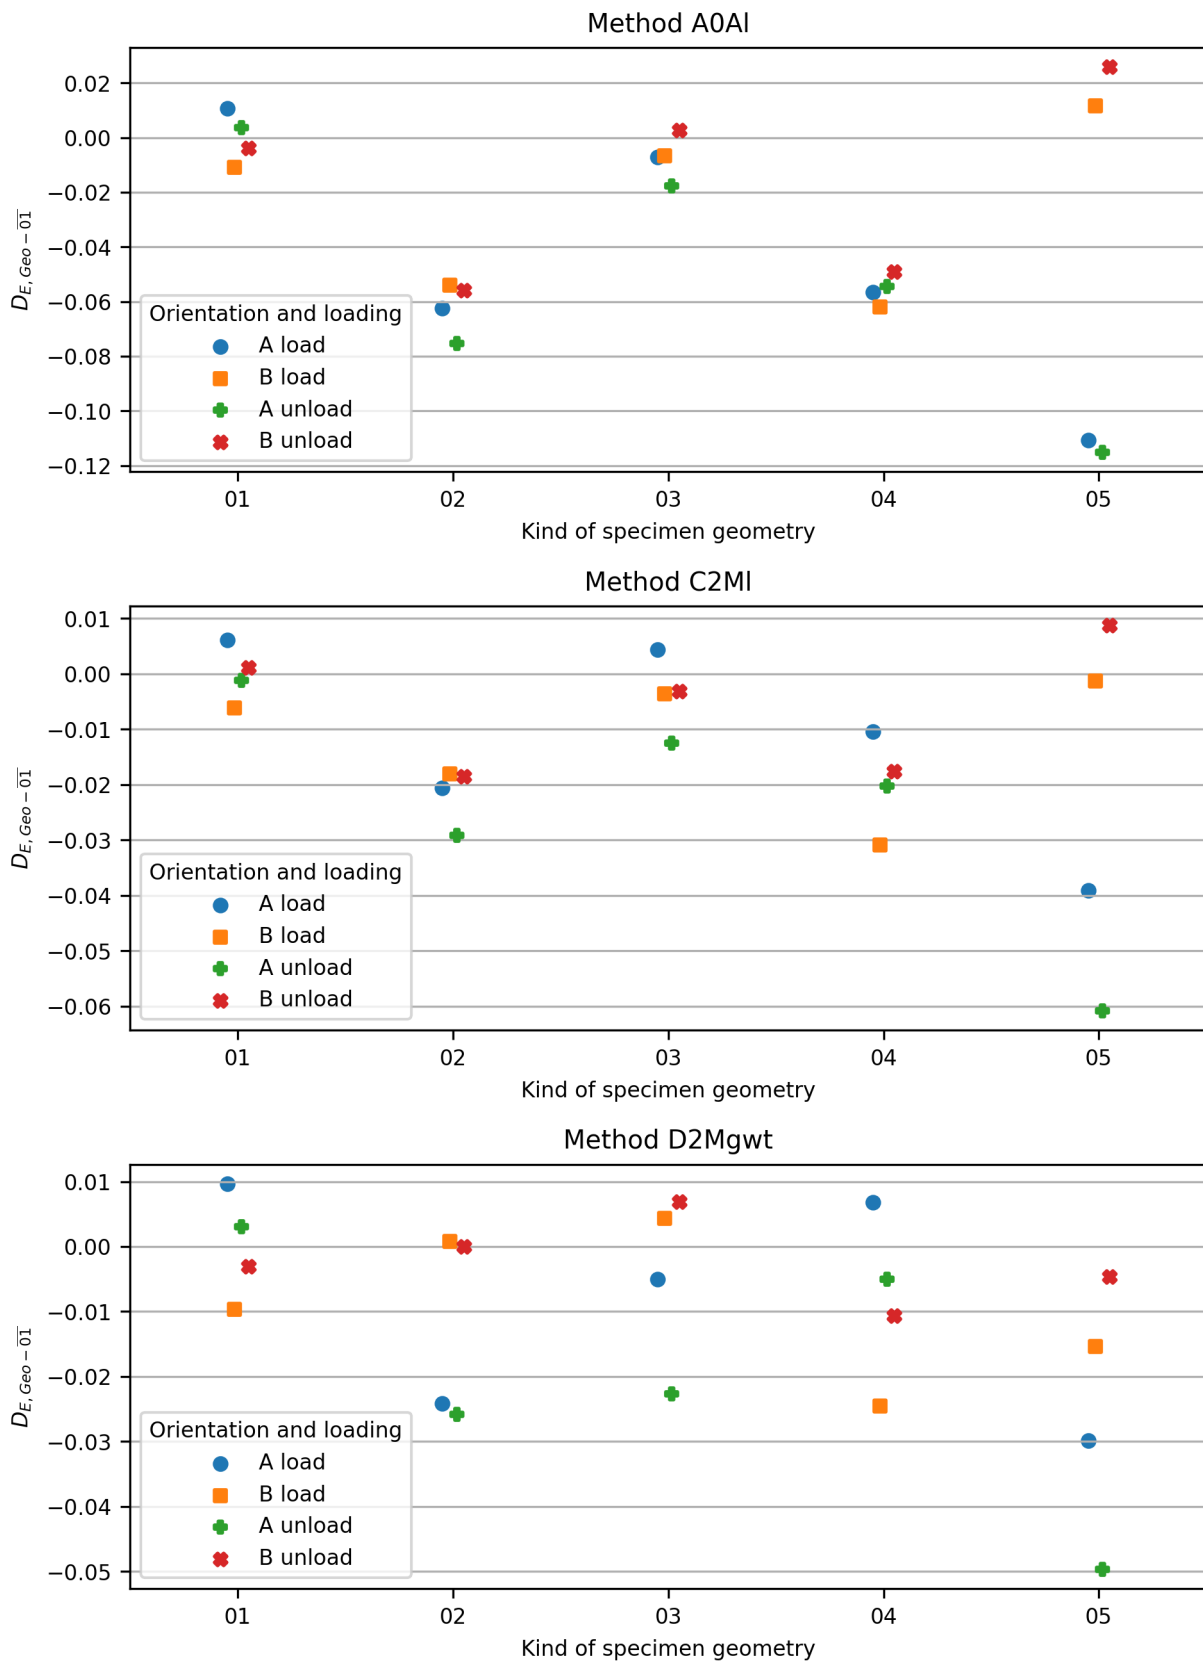

Figure 13: Verification tests - Relative deviation of the moduli of elasticity for the PLA specimen geometries from the mean values for the rectangular cuboid beam (01).

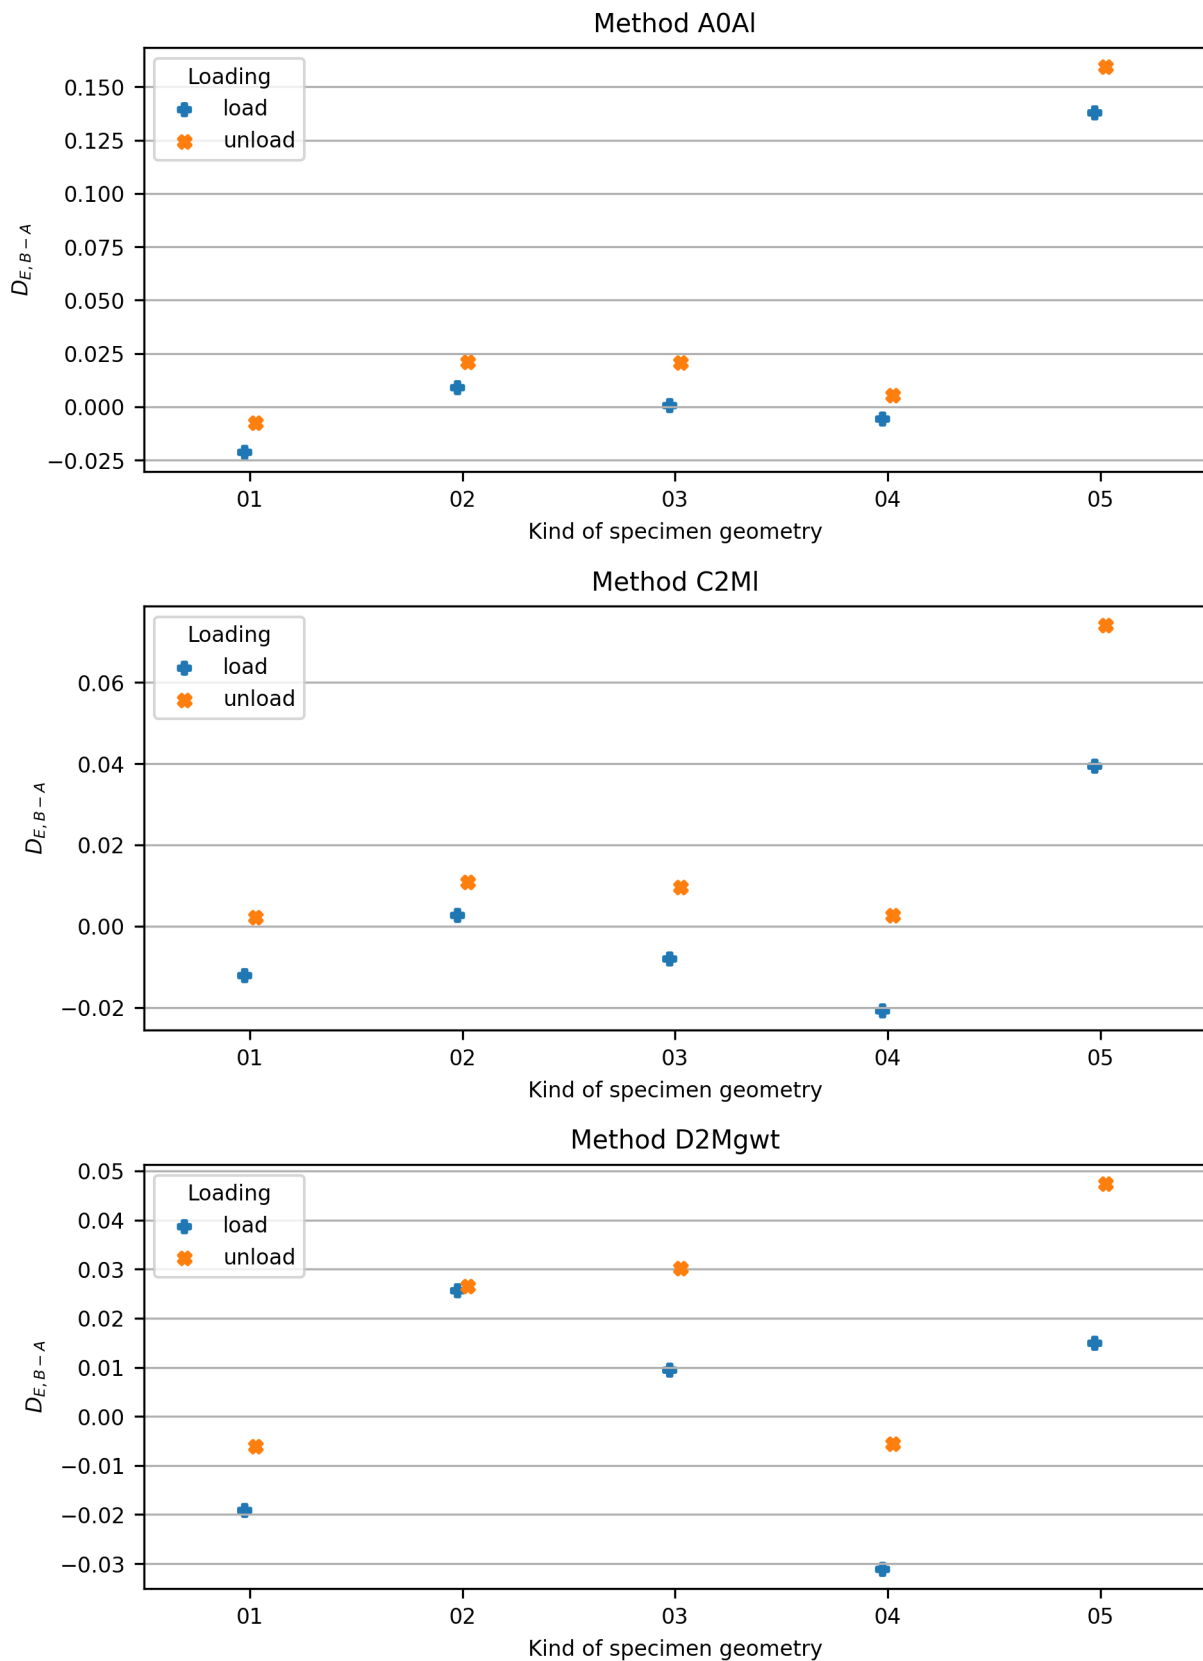

Figure 14: Verification tests - Relative deviation of the moduli of elasticity for the PLA specimen geometries in test position B from the one in test position A.
